# Supplementary material for: Metamorphic manganese mineralization bound to the metacarbonate lenses at the Smolník – Malá Hekerová deposit in the Spišsko-gemerské rudohorie Mts., Western Carpathians (Slovakia)
Source: Research Square preprint supplement (doi:10.21203/rs.3.rs-6072303/v1), 2025-02-26
Supplement: Supplementary file 1 [file 1eb72e9f6ce263c4168f0d14.xlsx]

## Sheet: Carbonates
Analysis	1	2	3	4	5	6	7	8	9	10	11	12	13	14	15	16	17	18	19	20	21	22	23	24	25	26	27	28	29	30	31	32	33	34	35	36	37	38	39	40	41	42	43	44	45	46	47	48	49
Localization	matrix																																							veins
Mineral	Ca-rich rhodochrosite																							kutnohorite																rhodochrosite
CaO	7.353	7.337	6.968	6.896	7.256	13.566	14.26	12.975	13.182	12.212	15.205	15.117	15.177	15.26	15.178	15.352	15.084	15.954	15.598	6.673	9.587	10.324	10.201	35.616	35.711	35.296	34.746	36.535	35.681	35.692	34.941	36.56	35.69	35.502	37.208	34.978	33.973	38.003	34.65	12.196	12.475	12.409	12.353	12.251	2.357	2.619	2.196	2.333	2.611
MgO	0.494	0.535	0.5	0.519	0.52	0.387	0.359	0.473	0.427	0.463	0.425	0.411	0.435	0.425	0.408	0.412	0.457	0.411	0.333	0.435	0.417	0.351	0.363	0.713	0.724	0.635	0.675	0.592	0.651	0.639	0.699	0.658	0.711	0.613	0.754	0.777	0.856	0.742	0.694	0.563	0.505	0.567	0.58	0.54	0.297	0.326	0.275	0.728	0.805
FeO	3.119	3.211	3.059	3.344	3.197	2.455	2.311	2.756	2.664	2.686	1.225	1.39	1.359	1.355	1.223	1.315	1.344	1.234	1.181	1.604	1.428	1.404	1.326	1.603	1.534	1.724	1.704	1.346	1.55	1.681	1.657	1.384	1.613	1.629	1.066	1.847	1.795	0.949	2.049	4.485	4.408	4.45	4.549	4.546	1.134	1.18	1.298	2.755	2.825
MnO	50.408	50.489	51.297	51.38	51.225	44.993	43.422	44.118	44.087	45.018	43.456	43.664	43.987	43.904	43.504	43.675	43.629	42.733	43.982	52.912	49.847	49.128	49.784	19.817	19.325	19.689	19.745	18.647	19.494	19.122	20.032	18.998	19.517	19.57	17.904	19.977	20.547	17.665	19.986	43.851	43.902	43.686	43.921	43.754	58.507	58.485	58.978	56.845	56.054
SrO	0.097	0	0	0.027	0	0.036	0.048	0.098	0	0.111	0	0.05	0.033	0	0	0	0	0.031	0	0	0	0.035	0	0.06	0.081	0.045	0.033	0.052	0.127	0.178	0.096	0.091	0.091	0.051	0.084	0.042	0.027	0	0.059	0	0	0	0	0	0	0	0	0	0
CO2*	39.5346	39.6323	39.7126	39.9144	40.0004	40.5017	39.958	39.7996	39.7946	39.7109	40.1072	40.2742	40.5216	40.5079	40.096	40.3993	40.2274	40.2498	40.6145	39.5208	39.7787	39.8392	40.1001	42.0316	41.7796	41.6836	41.3131	41.734	41.8105	41.6772	41.6683	42.0833	41.9207	41.6918	41.8202	41.8419	41.4548	42.1754	41.6304	40.1384	40.2785	40.1861	40.3628	40.1336	39.1662	39.418	39.4085	39.5798	39.4342
Total	101.006	101.204	101.537	102.08	102.198	101.939	100.358	100.22	100.155	100.201	100.418	100.906	101.513	101.452	100.409	101.153	100.741	100.613	101.709	101.145	101.058	101.081	101.774	99.8406	99.1546	99.0726	98.2161	98.906	99.3135	98.9892	99.0933	99.7743	99.5427	99.0568	98.8362	99.4629	98.6528	99.5344	99.0684	101.233	101.568	101.298	101.766	101.225	101.461	102.028	102.155	102.241	101.729
Ca2+	0.145963	0.145287	0.137701	0.135589	0.142361	0.262867	0.280074	0.25585	0.259964	0.241342	0.297523	0.294575	0.293938	0.295646	0.297078	0.298227	0.294274	0.311073	0.301401	0.132511	0.189142	0.203373	0.199643	0.665006	0.670802	0.664533	0.660045	0.687029	0.669743	0.672093	0.658091	0.681793	0.668151	0.66828	0.698243	0.656055	0.643155	0.707156	0.653205	0.238459	0.243066	0.242336	0.240186	0.239563	0.0472286	0.0521432	0.043732	0.0462591	0.0519625
Mg2+	0.0136439	0.0147399	0.0137477	0.014198	0.0141948	0.0104334	0.00981024	0.0129769	0.0117163	0.0127309	0.0115706	0.011143	0.0117217	0.0114561	0.0111109	0.0111356	0.0124046	0.0111498	0.00895266	0.0120185	0.0114465	0.00962023	0.0098844	0.0185226	0.0189218	0.016634	0.0178404	0.0154889	0.0170014	0.0167414	0.0183172	0.0170728	0.0185195	0.0160546	0.0196868	0.0202768	0.0225469	0.0192103	0.0182028	0.0153157	0.0136901	0.0154062	0.0156904	0.0146918	0.00828007	0.0090305	0.0076196	0.0200838	0.0222901
Fe2+	0.0483268	0.0496297	0.0471847	0.05132	0.0489586	0.0371304	0.035428	0.0424181	0.0410072	0.041433	0.0187096	0.0211417	0.0205439	0.0204904	0.0186843	0.019939	0.0204658	0.0187803	0.0178123	0.0248616	0.0219901	0.0215878	0.0202558	0.0233619	0.0224912	0.0253351	0.0252658	0.0197563	0.0227089	0.024707	0.0243594	0.0201455	0.0235699	0.0239343	0.0156143	0.02704	0.0265241	0.0137834	0.0301497	0.0684468	0.0670377	0.067832	0.0690375	0.069386	0.0177359	0.0183374	0.020176	0.0426382	0.043883
Mn2+	0.791024	0.790344	0.801367	0.798606	0.794486	0.689192	0.674178	0.68771	0.687313	0.703307	0.672196	0.672613	0.673451	0.672408	0.673127	0.670698	0.672856	0.65867	0.671834	0.830609	0.777421	0.765045	0.770217	0.292503	0.286962	0.29304	0.296509	0.277196	0.289257	0.284645	0.298254	0.28007	0.288837	0.291211	0.265603	0.296202	0.307498	0.25985	0.297841	0.677778	0.676207	0.674426	0.675086	0.676359	0.926755	0.920489	0.928472	0.891019	0.881864
Sr2+	0.00104207	0	0	0.0002873	0	0.000377512	0.000510199	0.0010458	0	0.00118718	0	0.000527285	0.000345883	0	0	0	0	0.000327114	0	0	0	0.00037313	0	0.000606285	0.000823422	0.00045851	0.000339257	0.000529194	0.00129009	0.00181394	0.000978514	0.000918403	0.000921966	0.000519543	0.00085309	0.000426324	0.000276625	0	0.000601927	0	0	0	0	0	0	0	0	0	0
Sum cat.	1	1	1	1	1	1	1	1	1	1	1	1	1	1	1	1	1	1	1	1	1	1	1	1	1	1	1	1	1	1	1	1	1	1	1	1	1	1	1	1	1	1	1	1	1	1	1	1	1
CaCO3	12.9929	12.9392	12.2482	12.0571	12.6719	23.7521	25.3604	23.107	23.4909	21.7522	27.0248	26.7385	26.6842	26.8462	26.9793	27.0878	26.7237	28.3012	27.3716	11.7751	16.9317	18.2291	17.8893	63.6688	64.2803	63.5858	63.1409	65.9288	64.1235	64.3534	62.9331	65.3997	63.992	63.9672	67.1906	62.7657	61.4629	68.1449	62.4247	21.5022	21.9215	21.8637	21.665	21.601	4.14618	4.58147	3.83671	4.07267	4.58089
MgCO3	1.02312	1.10586	1.03013	1.06358	1.0644	0.794179	0.748323	0.987313	0.891873	0.96662	0.885366	0.852061	0.896428	0.876345	0.85003	0.852047	0.948975	0.854545	0.68491	0.899688	0.863203	0.726412	0.746132	1.49392	1.52747	1.34081	1.4377	1.25212	1.37126	1.35039	1.47564	1.3796	1.49419	1.29456	1.59589	1.6342	1.81514	1.55947	1.46545	1.16341	1.04011	1.17092	1.19226	1.11597	0.612355	0.668413	0.563141	1.48954	1.65538
FeCO3	4.97946	5.11627	4.85813	5.28246	5.04442	3.88351	3.7133	4.43444	4.28919	4.32262	1.96714	2.22131	2.1588	2.15373	1.96411	2.09632	2.15131	1.97776	1.87243	2.55725	2.27861	2.2398	2.10096	2.58904	2.49474	2.80605	2.79769	2.19449	2.51672	2.73837	2.69644	2.23681	2.61299	2.65185	1.73922	2.99446	2.93405	1.53746	3.33518	7.14416	6.99834	7.08388	7.20819	7.24195	1.80229	1.86498	2.04892	4.3452	4.47801
MnCO3	80.8677	80.8386	81.8635	81.5592	81.2193	71.5199	70.1098	71.332	71.3281	72.8007	70.1227	70.1176	70.2142	70.1237	70.2066	69.9639	70.176	68.8226	70.0711	84.7679	79.9264	78.7553	79.2636	32.1626	31.5811	32.2026	32.5758	30.5497	31.8063	31.3016	32.7568	30.8539	31.7706	32.0131	29.3532	32.5455	33.7489	28.7582	32.6898	70.1903	70.0401	69.8815	69.9345	70.0411	93.4392	92.8851	93.5512	90.0926	89.2857
SrCO3	0.136822	0	0	0.0376835	0	0.0503145	0.0681426	0.139317	0	0.157827	0	0.0705962	0.0463152	0	0	0	0	0.0438973	0	0	0	0.0493318	0	0.0856196	0.116386	0.0647125	0.0478697	0.0749048	0.18219	0.25619	0.138024	0.129943	0.130245	0.0733525	0.121086	0.0601614	0.0389927	0	0.0848489	0	0	0	0	0	0	0	0	0	0
Chemical formulae calculated on the basis of 1 cation (apfu), symbol * represents calculation of CO2
[truncated: 53 more columns]

## Sheet: Rhodonite gr.
Analysis	1	2	3	4	5	6	7	8	9	10	11	12	13	14	15	16	17	18	19	20	21	22	23	24	25	26	27	28	29	30	31	32	33	34
Lacalization	Matrix																							Veins
SiO2	46.597	46.751	46.64	46.481	46.523	46.57	46.769	46.862	46.635	46.535	44.832	44.931	46.128	46.33	46.491	46.352	46.601	46.279	46.334	46.601	46.251	46.36	46.031	46.091	46.456	46.216	46.481	46.235	45.722	46.525	46.743	45.615	46.274	45.641
TiO2	0	0	0.076	0	0	0	0	0	0	0	0.067	0	0	0.057	0	0	0	0	0	0	0	0	0	0	0	0	0	0.097	0.029	0	0.029	0	0	0.048
Al2O3	0	0	0	0	0	0.03	0	0	0	0	0	0.062	0	0	0	0	0	0	0	0	0	0	0.066	0	0.026	0	0	0	0.123	0	0.026	0.063	0	0.354
Cr2O3	0	0	0	0	0	0	0	0	0	0	0	0	0	0	0	0	0	0	0	0	0	0	0	0	0	0	0	0	0	0	0	0	0	0
V2O3	0.034	0	0	0	0	0	0	0	0	0	0	0	0	0	0	0	0	0	0	0	0	0	0	0	0	0	0	0	0	0	0	0	0	0
FeO	7.121	7.66	7.777	8.758	8.529	6.787	6.234	5.68	7.387	8.05	9.006	10.522	8.469	7.978	7.593	8.011	7.824	7.096	8.145	7.619	7.056	7.607	6.057	4.261	4.347	5.024	4.106	5.047	2.962	2.511	3.439	2.83	5.093	5.962
MnO	39.54	37.423	39.602	38.014	39.52	40.541	41.146	40.863	39.532	39.227	39.935	38.642	40.188	39.328	39.234	39.218	39.038	39.799	39.255	39.484	39.505	40.957	42.103	42.136	40.677	42.342	41.466	40.627	45.169	42.243	41.507	43.546	42.911	41.33
MgO	1.438	1.431	1.351	1.394	1.659	1.719	1.589	1.568	1.575	1.106	1.467	2.163	0.936	1.112	0.935	1.157	1.081	1.046	1.068	1.072	0.936	1.004	0.401	0.531	0.502	0.697	0.549	0.752	0.349	0.28	0.415	0.342	0.607	0.541
ZnO	0	0	0	0	0	0	0	0	0	0	0	0	0	0	0	0	0	0	0	0	0	0	0	0	0	0	0	0	0	0	0	0	0	0
NiO	0	0	0	0	0	0	0	0	0	0	0	0	0	0	0	0	0	0	0	0	0	0	0	0	0	0	0	0	0	0	0	0	0	0
BaO	0	0	0	0	0	0	0	0	0	0	0	0	0	0	0	0	0	0	0	0	0	0	0	0	0	0	0	0	0	0	0	0	0	0
SrO	0	0	0	0	0	0	0	0	0	0	0	0	0	0	0	0	0	0	0	0	0	0	0	0	0	0	0	0	0	0	0	0	0	0
CaO	5.404	5.284	5.483	4.987	4.563	5.294	5.155	5.173	5.27	5.665	5.243	4.574	4.792	5.796	6.021	5.513	5.687	5.44	5.52	5.562	5.577	5.228	6.076	7.089	7.64	7.069	7.783	6.728	5.938	8.476	8.377	7.978	6.273	6.992
Total	100.134	98.549	100.929	99.634	100.794	100.941	100.893	100.146	100.399	100.583	100.55	100.894	100.513	100.601	100.274	100.251	100.231	99.66	100.322	100.338	99.325	101.156	100.734	100.108	99.648	101.348	100.385	99.486	100.292	100.035	100.536	100.374	101.158	100.868
Si4+	4.97074	5.03061	4.95014	4.98348	4.94876	4.93878	4.95806	4.98656	4.9638	4.95948	4.84058	4.82694	4.94556	4.94289	4.96671	4.95734	4.97467	4.97304	4.95605	4.97258	4.98272	4.93646	4.93144	4.94463	4.97812	4.91277	4.95623	4.96876	4.92261	4.96962	4.96556	4.89961	4.93051	4.88069
Ti4+	0	0	0.00606736	0	0	0	0	0	0	0	0.00544141	0	0	0.00457426	0	0	0	0	0	0	0	0	0	0	0	0	0	0.00784108	0.00234853	0	0.00231727	0	0	0.00386095
Al3+	0	0	0	0	0	0.00374963	0	0	0	0	0	0.00785002	0	0	0	0	0	0	0	0	0	0	0.00833337	0	0.0032836	0	0	0	0.0156073	0	0.0032552	0.00797531	0	0.0446152
Cr3+	0	0	0	0	0	0	0	0	0	0	0	0	0	0	0	0	0	0	0	0	0	0	0	0	0	0	0	0	0	0	0	0	0	0
V3+	0.00290793	0	0	0	0	0	0	0	0	0	0	0	0	0	0	0	0	0	0	0	0	0	0	0	0	0	0	0	0	0	0	0	0	0
Sum	4.97365	5.03061	4.9562	4.98348	4.94876	4.94253	4.95806	4.98656	4.9638	4.95948	4.84602	4.83479	4.94556	4.94746	4.96671	4.95734	4.97467	4.97304	4.95605	4.97258	4.98272	4.93646	4.93977	4.94463	4.98141	4.91277	4.95623	4.9766	4.94056	4.96962	4.97113	4.90758	4.93051	4.92917
Ca2+	0.617631	0.609176	0.623487	0.572859	0.520032	0.601518	0.585508	0.589758	0.600985	0.646856	0.606513	0.526469	0.550451	0.662518	0.689159	0.631712	0.650434	0.626307	0.632595	0.635871	0.64372	0.596429	0.697416	0.814805	0.877138	0.805087	0.889147	0.774665	0.684953	0.970015	0.953434	0.918118	0.716112	0.801084
Mn2+	0.382369	0.390824	0.376513	0.427141	0.479968	0.398482	0.414492	0.410242	0.399015	0.353144	0.393487	0.473531	0.449549	0.337482	0.310841	0.368288	0.349566	0.373693	0.367405	0.364129	0.35628	0.403571	0.302584	0.185195	0.122862	0.194913	0.110853	0.225335	0.315047	0.0299849	0.0465661	0.081882	0.283888	0.198916
Sum M5	1	1	1	1	1	1	1	1	1	1	1	1	1	1	1	1	1	1	1	1	1	1	1	1	1	1	1	1	1	1	1	1	1	1
Ca2+	0	0	0	0	0	0	0	0	0	0	0	0	0	0	0	0	0	0	0	0	0	0	0	0	0	0	0	0	0	0	0	0	0	0
Mn2+	3	3	3	3	3	3	3	3	3	3	3	3	3	3	3	3	3	3	3	3	3	3	3	3	3	3	3	3	3	3	3	3	3	3
Sum M1-M3	3	3	3	3	3	3	3	3	3	3	3	3	3	3	3	3	3	3	3	3	3	3	3	3	3	3	3	3	3	3	3	3	3	3
Mn2+	0.190215	0.0199343	0.183558	0.024964	0.0806786	0.24311	0.280081	0.272689	0.164952	0.187845	0.258639	0.0426246	0.199928	0.216402	0.239299	0.184335	0.18015	0.248678	0.18902	0.204415	0.248517	0.290314	0.517908	0.64353	0.569086	0.617396	0.634138	0.472732	0.80397	0.791872	0.688132	0.879848	0.588745	0.544555
Fe2+	0.635269	0.689306	0.690279	0.785265	0.758719	0.601929	0.552681	0.505455	0.657543	0.717474	0.813195	0.945317	0.759342	0.711814	0.678371	0.716508	0.698477	0.637684	0.728586	0.67989	0.635709	0.677391	0.542669	0.382282	0.389554	0.446619	0.366141	0.453591	0.266691	0.224304	0.305518	0.254211	0.453819	0.533178
Mg2+	0.22868	0.229549	0.213757	0.222806	0.263076	0.271767	0.251121	0.248733	0.249913	0.175719	0.236127	0.346408	0.149601	0.17686	0.148908	0.184468	0.172029	0.167562	0.170299	0.170525	0.150324	0.159372	0.0640434	0.0849217	0.0801925	0.110452	0.0872679	0.120476	0.0560147	0.0445863	0.0657212	0.0547629	0.0964162	0.0862442
Zn2+	0	0	0	0	0	0	0	0	0	0	0	0	0	0	0	0	0	0	0	0	0	0	0	0	0	0	0	0	0	0	0	0	0	0
Ni2+	0	0	0	0	0	0	0	0	0	0	0	0	0	0	0	0	0	0	0	0	0	0	0	0	0	0	0	0	0	0	0	0	0	0
Sum M4	1.05416	0.938789	1.08759	1.03303	1.10247	1.11681	1.08388	1.02688	1.07241	1.08104	1.30796	1.33435	1.10887	1.10508	1.06658	1.08531	1.05066	1.05392	1.0879	1.05483	1.03455	1.12708	1.12462	1.11073	1.03883	1.17447	1.08755	1.0468	1.12668	1.06076	1.05937	1.18882	1.13898	1.16398
M5Ca/(Ca+Mn)	0.617631	0.609176	0.623487	0.572859	0.520032	0.601518	0.585508	0.589758	0.600985	0.646856	0.606513	0.526469	0.550451	0.662518	0.689159	0.631712	0.650434	0.626307	0.632595	0.635871	0.64372	0.596429	0.697416	0.814805	0.877138	0.805087	0.889147	0.774665	0.684953	0.970015	0.953434	0.918118	0.716112	0.801084
M4Mn/(Mn+Fe)	0.230428	0.0281066	0.21006	0.0308111	0.0961149	0.287691	0.336328	0.350435	0.200551	0.20749	0.241305	0.0431448	0.208417	0.233138	0.260768	0.204625	0.205036	0.280561	0.205992	0.231159	0.281056	0.300003	0.488327	0.627338	0.593639	0.580251	0.633961	0.510332	0.75091	0.779266	0.692529	0.77584	0.564709	0.505278
Chemical formulae calculated on the basis of 15 O atoms (apfu)
																					5.68	10.522

## Sheet: Spessartine
Analysis	1	2	3	4	5	6	7	8	9	10	11	12	13	14	15	16	17	18	19	20	21	22	23	24	25	26	27	28	29	30	31	32	33	34	35	36	37	38	39	40	41	42	43	44	45	46	47	48	49
Localization	spessartine in matrix																													spessartine in veins																	spessartine (type sps1)
SiO2	35.79	36.105	36.049	36.144	35.415	36.292	35.624	36.045	35.077	35.484	35.703	36.044	35.869	35.124	34.268	34.218	34.028	34.016	35.855	35.874	35.736	36.267	35.817	35.885	35.775	35.772	35.694	35.371	34.892	35.12	35.11	35.403	35.069	35.134	35.251	36.411	35.788	34.89	35.803	35.071	35.603	35.196	35.483	35.553	35.196	35.306	35.422	35.006	35.631
TiO2	0.045	0.033	0	0	0.044	0	0.031	0.034	0.063	0.063	0.066	0.046	0	0.031	0.068	0.037	0.118	0.09	0.051	0	0.052	0.034	0.052	0.032	0.032	0	0.029	0	0	0	0	0	0	0	0.04	0.062	0.036	0	0.047	0	0	0	0	0.043	0.033	0	0	0	0
Al2O3	18.807	18.096	17.639	18.757	19.211	19.199	17.803	19.67	20.383	20.509	20.32	20.308	20.495	20.327	20.768	20.748	20.745	20.764	18.019	17.322	17.85	18.459	17.859	17.356	17.854	17.325	19.144	21	20.708	21.083	21.057	21.13	20.971	20.947	21.097	20.506	20.938	20.693	20.578	20.588	20.466	20.615	20.761	20.837	20.723	20.424	20.25	20.274	20.219
Cr2O3	0	0.032	0	0	0.027	0	0	0	0	0	0	0	0	0	0	0	0	0	0	0	0	0.061	0	0	0	0	0	0	0	0	0	0	0	0	0	0	0	0	0	0	0	0	0	0.031	0	0	0	0	0
V2O3	0	0	0	0	0	0	0.031	0	0.035	0	0	0	0.042	0	0.064	0.047	0.06	0.056	0	0	0	0	0	0	0.03	0	0	0.136	0.083	0	0	0.036	0.04	0.026	0	0.16	0.111	0.196	0.152	0.157	0.253	0.195	0.123	0.121	0.161	0.112	0	0	0.051
Y2O3	0	0.025	0	0.049	0.068	0	0.01	0	0	0.024	0.011	0	0.044	0	0.006	0.045	0	0.066	0.032	0	0	0	0	0.016	0.011	0	0.032	0	0	0	0	0	0	0	0.006	0	0	0.091	0.003	0.003	0.099	0.018	0.033	0.104	0	0.035	0	0.057	0
Fe2O3*	3.60409	4.27089	5.38668	3.59075	2.58943	3.38182	4.80878	2.22713	1.31472	1.39585	1.44363	1.55366	0.924637	1.32139	0.80239	0.865736	0.795722	0.983539	4.6732	5.94346	5.13218	4.52983	5.07773	5.61228	5.10106	6.03793	3.04953	1.80816	1.45475	1.11023	1.1858	1.00799	1.33917	1.25582	1.15691	2.09044	2.19046	0.86018	1.73258	1.00132	1.50254	0.994652	1.5481	1.43141	1.587	1.67035	1.41029	1.31805	1.90151
FeO	0	0	0	0	0	0	0	0	0	0	0	0	0	0	0	0	0	0	0	0	0	0	0	0	0	0	0	0	0	0	0	0	0	0	0	0	0	0	0	0	0	0	0	0	0	0	0	0	0
MnO	37.646	36.339	36.823	39.534	36.257	37.911	36.687	39.536	39.795	40.08	39.839	39.825	40.953	38.004	38.48	37.714	38.457	37.131	36.577	35.509	36.891	36.607	36.729	36.721	38.191	36.57	38.545	33.607	32.295	30.855	30.448	28.975	30.072	30.521	29.686	32.515	32.485	34.637	33.478	34.368	32.309	34.14	34.508	33.545	33.518	33.456	38.48	38.86	38.903
ZnO	0.033	0	0.094	0.102	0.045	0.045	0	0	0	0	0	0.061	0	0	0	0	0	0.025	0.147	0	0.033	0.045	0	0	0	0.089	0	0	0	0.025	0	0	0	0.17	0	0	0	0	0	0.099	0	0	0.025	0.07	0	0	0.119	0.136	0.152
MgO	0.058	0.054	0.038	0.029	0.058	0.048	0.039	0.034	0.064	0.044	0.04	0.063	0.058	0.061	0.031	0.043	0	0.03	0.077	0.061	0.08	0.075	0.056	0.058	0.066	0.11	0.037	0.036	0	0	0	0	0	0	0	0.523	0.029	0	0.051	0.051	0.056	0	0.044	0.052	0.039	0.038	0.052	0.041	0.045
CaO	4.904	5.199	5.525	3.488	5.824	3.892	5.211	3.696	3.374	2.218	2.299	2.709	2.108	3.98	4.693	4.671	4.539	4.547	5.333	5.838	5.094	5.037	5.136	5.541	4.688	5.178	4.755	8.805	9.507	11.282	11.967	12.755	11.258	10.883	11.905	8.762	8.885	7.782	8.34	7.833	9.469	8.218	8.015	8.434	8.141	8.542	4.224	4.431	4.002
Na2O	0.038	0.02	0	0	0	0	0	0	0	0	0.024	0.036	0	0	0.055	0	0.058	0.052	0	0	0	0	0	0	0	0	0	0	0	0	0	0	0.028	0	0.016	0	0	0.037	0.025	0	0	0.027	0	0	0	0	0.033	0	0
K2O	0	0	0	0	0	0	0	0	0	0	0	0	0	0	0	0	0	0	0	0	0	0	0	0	0	0	0	0	0	0	0	0	0	0	0	0	0	0	0	0	0	0	0	0	0	0	0	0	0
Total	100.925	100.174	101.555	101.694	99.5384	100.769	100.245	101.242	100.106	99.8178	99.7456	100.646	100.494	98.8484	99.2354	98.3887	98.8007	97.7605	100.764	100.547	100.868	101.115	100.727	101.221	101.748	101.082	101.286	100.763	98.9397	99.4752	99.7678	99.307	98.7772	98.9368	99.1579	101.029	100.462	99.1862	100.21	99.1713	99.7575	99.4037	100.54	100.221	99.398	99.5833	99.9903	100.123	100.905
Zn2+	0.00195699	0	0.00559069	0.00605401	0.00269063	0.0027138	0	0	0	0	0	0.0036446	0	0	0	0	0	0.00150121	0.00880545	0	0.00197694	0.00270372	0	0	0	0.00533873	0	0	0	0.00144538	0	0	0	0.00994898	0	0	0	0	0	0.00582148	0	0	0.00145413	0.00409498	0	0	0.00705097	0.00798799	0.00896574
Si4+	2.87468	2.96077	2.90392	2.90558	2.86802	2.96435	2.90628	2.88784	2.80972	2.89625	2.92309	2.9168	2.89933	2.8661	2.72	2.75978	2.71394	2.76655	2.90896	2.93654	2.89961	2.95131	2.91609	2.9016	2.86635	2.90633	2.8422	2.77082	2.77344	2.7501	2.72882	2.77384	2.77819	2.78491	2.77488	2.87596	2.84685	2.76887	2.8483	2.79318	2.82858	2.79305	2.79536	2.81698	2.81324	2.80965	2.84268	2.7848	2.84658
Al3+	0.12336	0.0392294	0.0904906	0.0883668	0.129286	0.0329368	0.0937235	0.112165	0.190281	0.103751	0.0769079	0.0795559	0.10067	0.133903	0.280001	0.240223	0.28606	0.231953	0.0822353	0.063457	0.0984117	0.0459874	0.0839057	0.0983963	0.13365	0.0883318	0.157802	0.229183	0.226562	0.24845	0.271183	0.226161	0.221813	0.205143	0.225124	0.124043	0.153154	0.231127	0.151705	0.200994	0.171424	0.206948	0.203189	0.178924	0.186765	0.19035	0.150266	0.207209	0.144451
Sum Z	3	3	3	3	3	3	3	3	3	3	3	3	3	3	3	3	3	3	3	3	3	3	3	3	3	3	3	3	3	3	3	3	3	3	3	3	3	3	3	3	3	3	3	3	3	3	3	3	3
Ti4+	0.00271874	0.00203554	0	0	0.00268025	0	0.00190232	0.00204896	0.00379584	0.00386786	0.00406452	0.0028	0	0.00190272	0.00405991	0.00224465	0.00707902	0.00550585	0.00311233	0	0.00317369	0.00208118	0.00318451	0.00194627	0.00192853	0	0.00173694	0	0	0	0	0	0	0	0.00236842	0.00368357	0.00215405	0	0.00281249	0	0	0	0	0.00256273	0.00198406	0	0	0	0
Al3+	1.65697	1.7097	1.58414	1.68874	1.70429	1.81527	1.61803	1.74515	1.73397	1.86913	1.88381	1.85729	1.85178	1.82095	1.6628	1.73197	1.66392	1.75835	1.64071	1.60766	1.60856	1.72439	1.62975	1.55558	1.55228	1.5706	1.63877	1.70962	1.71336	1.69727	1.65765	1.72501	1.73618	1.75171	1.73213	1.78486	1.80982	1.70431	1.7777	1.7315	1.74489	1.72112	1.72442	1.76687	1.76541	1.72522	1.76502	1.69363	1.7593
Fe3+	0.344309	0.294508	0.42203	0.313427	0.289078	0.215478	0.38232	0.248594	0.262859	0.155788	0.13862	0.162108	0.150258	0.195143	0.330573	0.275668	0.330433	0.26374	0.368416	0.410947	0.40041	0.298156	0.37944	0.439862	0.441335	0.448777	0.348462	0.308805	0.297463	0.309745	0.341445	0.279162	0.283614	0.273291	0.27949	0.222965	0.231531	0.283783	0.23307	0.265496	0.248028	0.268106	0.282151	0.243226	0.251262	0.278265	0.244824	0.303023	0.257067
V3+	0	0	0	0	0	0	0.00202767	0	0.00224776	0	0	0	0.00272189	0	0.00407289	0.0030392	0.0038367	0.00365161	0	0	0	0	0	0	0.00192714	0	0	0.00854165	0.00528948	0	0	0.00226144	0.00254062	0.00165234	0	0.0101324	0.00707932	0.012471	0.00969508	0.0100252	0.0161155	0.0124069	0.00776898	0.00768662	0.0103177	0.00714602	0	0	0.00326669
Cr3+	0	0.00207472	0	0	0.00172875	0	0	0	0	0	0	0	0	0	0	0	0	0	0	0	0	0.00392469	0	0	0	0	0	0	0	0	0	0	0	0	0	0	0	0	0	0	0	0	0	0.00194197	0	0	0	0	0
Fe2+	0	0	0	0	0	0	0	0	0	0	0	0	0	0	0	0	0	0	0	0	0	0	0	0	0	0	0	0	0	0	0	0	0	0	0	0	0	0	0	0	0	0	0	0	0	0	0	0	0
Mn2+	0	0	0	0	0.00222262	0	0	0.00420828	0	0	0	0	0	0	0	0	0	0	0	0	0	0	0	0.00261604	0.0025327	0	0.0110283	0	0	0	0.00090969	0	0	0	0	0	0	0	0	0	0	0	0	0	0	0	0	0.00334886	0
Sum Y	2.004	2.00832	2.00617	2.00217	2	2.03075	2.00428	2	2.00287	2.02879	2.02649	2.02219	2.00476	2.01799	2.0015	2.01292	2.00527	2.03125	2.01224	2.01861	2.01214	2.02855	2.01237	2	2	2.01938	2	2.02696	2.01611	2.00702	2	2.00643	2.02233	2.02666	2.01399	2.02164	2.05059	2.00056	2.02327	2.00703	2.00904	2.00163	2.01434	2.02228	2.02897	2.01063	2.00985	2	2.01963
Fe2+	0	0	0	0	0	0	0	0	0	0	0	0	0	0	0	0	0	0	0	0	0	0	0	0	0	0	0	0	0	0	0	0	0	0	0	0	0	0	0	0	0	0	0	0	0	0	0	0	0
Mn2+	2.56112	2.52402	2.51243	2.69185	2.48475	2.62281	2.53507	2.67868	2.69993	2.77086	2.76267	2.72968	2.8038	2.62663	2.58701	2.57635	2.5979	2.55784	2.5135	2.46194	2.53535	2.52319	2.53282	2.51229	2.58922	2.51657	2.58859	2.22984	2.17426	2.04646	2.00349	1.92286	2.01782	2.04911	1.97928	2.17529	2.18873	2.32823	2.25584	2.3184	2.17414	2.29473	2.30261	2.25122	2.26921	2.25507	2.61561	2.61506	2.63246
Mg2+	0.00694485	0.00660142	0.00456332	0.00347537	0.00700212	0.00584475	0.00474313	0.00406081	0.00764235	0.0053538	0.00488207	0.00760012	0.00698896	0.00742033	0.00366816	0.00517004	0	0.00363733	0.0093129	0.00744377	0.00967677	0.00909852	0.00679684	0.00699133	0.00788315	0.013323	0.00439205	0.00420406	0	0	0	0	0	0	0	0.0615826	0.00343899	0	0.00604842	0.00605519	0.00663248	0	0.00516745	0.00614211	0.00464712	0.0045081	0.00622107	0.0048623	0.00535938
Ca2+	0.422017	0.456781	0.476842	0.300417	0.505321	0.340598	0.455477	0.317256	0.289558	0.193962	0.201664	0.234873	0.182558	0.347953	0.3991	0.403627	0.38786	0.396215	0.463565	0.512002	0.442837	0.439163	0.448011	0.480025	0.402428	0.450728	0.405658	0.738994	0.809631	0.946524	0.996505	1.07071	0.955543	0.924236	1.00404	0.741488	0.757242	0.661674	0.710857	0.668391	0.806002	0.698719	0.676505	0.715965	0.697174	0.728306	0.363187	0.377663	0.34255
Na+	0.00591774	0.00317989	0	0	0	0	0	0	0	0	0.00380972	0.00564833	0	0	0.00846422	0	0.00896884	0.00819978	0	0	0	0	0	0	0	0	0	0	0	0	0	0	0.00430071	0	0.00244195	0	0	0.00569309	0.00385611	0	0	0.00415426	0	0	0	0	0.00513468	0	0
K+	0	0	0	0	0	0	0	0	0	0	0	0	0	0	0	0	0	0	0	0	0	0	0	0	0	0	0	0	0	0	0	0	0	0	0	0	0	0	0	0	0	0	0	0	0	0	0	0	0
Y3+	0	0.001091	0	0.00209624	0.00293057	0	0.000434152	0	0	0.00104247	0.000479268	0	0.00189269	0	0.000253442	0.00193143	0	0.00285658	0.00138161	0	0	0	0	0.000688482	0.000469018	0	0.00135599	0	0	0	0	0	0	0	0.000251345	0	0	0.00384318	0.000127009	0.000127151	0.00418566	0.000760161	0.0013835	0.00438519	0	0.00148224	0	0.00241309	0
Sum X	2.996	2.99168	2.99383	2.99783	3	2.96925	2.99572	3	2.99713	2.97121	2.97351	2.97781	2.99524	2.98201	2.9985	2.98708	2.99473	2.96875	2.98776	2.98139	2.98786	2.97145	2.98763	3	3	2.98062	3	2.97304	2.98389	2.99298	3	2.99357	2.97767	2.97334	2.98601	2.97836	2.94941	2.99944	2.97673	2.99297	2.99096	2.99837	2.98566	2.97772	2.97103	2.98937	2.99015	3	2.98037
Almandine	0	0	0	0	0	0	0	0	0	0	0	0	0	0	0	0	0	0	0	0	0	0	0	0	0	0	0	0	0	0	0	0	0	0	0	0	0	0	0	0	0	0	0	0	0	0	0	0	0
Pyrope	0.232263	0.220975	0.152424	0.11601	0.233459	0.196843	0.158353	0.135171	0.254989	0.180252	0.164423	0.255711	0.233483	0.248837	0.12269	0.173192	0	0.122978	0.311846	0.249675	0.323869	0.306198	0.227499	0.232895	0.262591	0.446986	0.145931	0.141406	0	0	0	0	0	0	0	2.06767	0.116599	0	0.203463	0.202322	0.222061	0	0.173156	0.206573	0.156415	0.150879	0.20841	0.162026	0.179823
Spessartine	85.6539	84.4888	83.9201	89.8559	82.9185	88.3323	84.6352	89.3044	90.0838	93.2894	93.0438	91.8418	93.6677	88.0827	86.5285	86.3056	87.0097	86.481	84.1655	82.5771	84.8549	84.9144	84.777	83.7765	86.3324	84.4311	86.3756	75.0021	72.8666	68.3752	66.7932	64.233	67.8633	68.916	66.3448	73.0365	74.2091	77.8697	75.884	77.4647	72.7922	76.6584	77.1579	75.7138	76.3778	75.4738	87.6246	87.2531	88.3266
Uvarovite	0	0.103306	0	0	0.0865336	0	0	0	0	0	0	0	0	0	0	0	0	0	0	0	0	0.193473	0	0	0	0	0	0	0	0	0	0	0	0	0	0	0	0	0	0	0	0	0	0.0963948	0	0	0	0	0
Goldmanite	0	0	0	0	0	0	0.10127	0	0.112353	0	0	0	0.135956	0	0.203906	0.151213	0.191697	0.180096	0	0	0	0	0	0	0.0965723	0	0	0.423184	0.263051	0	0	0.112837	0.125786	0.0815968	0	0.503721	0.34643	0.627284	0.481485	0.502013	0.808637	0.623704	0.387178	0.381546	0.511115	0.356679	0	0	0.162009
Schorlomite	0.0192629	0.0133127	0	0	0.0159084	0	0.0125099	0.0194023	0.0392896	0.0592293	0.0598444	0.0354321	0	0.0163066	0.030414	0.016601	0.0544945	0.0411006	0.0200503	0	0.0214132	0.0140816	0.0212364	0.0121713	0.0143866	0	0.0128867	0	0	0	0	0	0	0	0.00703732	0.0147959	0.0083899	0	0.0117616	0	0	0	0	0.0106428	0.00845511	0	0	0	0
Andradite	14.0946	15.1736	15.9275	10.0281	16.7456	11.4708	15.0927	10.541	9.50956	6.47109	6.73197	7.86702	5.96282	11.6521	13.1145	13.3534	12.7441	13.1749	15.5026	17.1733	14.7998	14.5719	14.9743	15.9784	13.2941	15.1219	13.4656	24.4334	26.8704	31.6248	33.2068	35.6542	32.0109	31.0024	33.6482	24.3773	25.3195	21.503	23.4192	21.8309	26.1771	22.7179	22.2818	23.591	22.9462	24.0186	12.167	12.5848	11.3315
Grossulare	0	0	0	0	0	0	0	0	0	0	0	0	0	0	0	0	0	0	0	0	0	0	0	0	0	0	0	0	0	0	0	0	0	0	0	0	0	0	0	0	0	0	0	0	0	0	0	0	0
Chemical formulae calculated on the basis of 8 cations and 12 oxygen atoms (apfu), symbol * represents calculation of Fe2O3 from charge balance
[truncated: 68 more columns]

## Sheet: Tephroite
Analysis	1	2	3	4	5	6	7	8	9	10	11	12	13	14	15	16	17	18	19	20	21	22	23	24	25	26	27	28	29	30	31	32	33	34	35	36	37	38	39	40	41	42	43
Location	inclusions in garnet							matrix
SiO2	29.4725	29.8224	29.9223	29.7067	30.2448	29.5274	29.4951	29.6499	29.6205	29.6401	29.2765	29.5784	29.5009	29.4402	29.105	29.5352	29.6705	29.6313	29.4392	29.2628	29.3971	29.5637	29.2099	29.5862	29.5107	29.3471	29.3706	29.4078	29.4568	29.545	29.6323	29.4304	29.4098	29.2099	29.3931	29.7724	29.6313	29.5784	29.5235	29.5862	29.4951	29.3128	29.1873
TiO2	0.06272	0	0.10682	0	0	0.0539	0	0.02646	0	0.0441	0	0	0.0441	0	0.06174	0.11466	0	0	0.0882	0	0	0.0441	0	0.11466	0	0	0.0441	0	0	0.02646	0	0	0	0.05292	0	0.0441	0	0	0	0	0	0.06174	0.07056
Al2O3	0.08134	0.44002	0.09898	0.19894	2.7783	0.0294	0.07644	0	0	0	0	0	0	0	0	0	0	0	0	0	0	0	0	0	0	0	0	0	0	0	0	0	0	0	0	0	0	0	0.03038	0	0	0	0
Cr2O3	0	0	0	0	0	0	0.03136	0	0	0	0	0.02548	0	0	0	0	0	0	0	0	0	0	0	0.04606	0	0	0.03136	0	0	0	0.03332	0.03822	0	0	0	0	0	0	0	0	0	0	0
V2O3	0	0	0	0	0	0	0	0	0	0	0	0	0	0	0	0	0	0	0	0	0	0	0	0	0	0	0	0	0	0	0	0	0	0	0	0	0	0	0	0	0	0	0
FeO	22.1039	21.7619	21.3228	21.8256	19.4109	26.3257	13.1643	5.61932	5.84766	6.13578	6.10246	6.0172	5.78984	5.46252	5.39882	5.76338	5.92704	5.64186	5.5125	6.35138	6.2377	6.18086	6.03778	6.27298	6.26808	6.17008	6.04072	5.90744	5.37138	5.75554	6.08286	5.97898	5.6056	5.71634	6.0417	6.0613	5.96036	5.8359	5.83786	5.9339	5.59776	5.87804	5.85844
MnO	47.3369	47.726	46.991	46.992	46.0963	41.7402	55.7963	64.2958	64.3605	64.632	63.5314	64.386	64.2723	64.0136	63.4383	64.7564	63.9528	64.4693	64.0891	64.3938	62.967	63.5344	64.2537	63.3746	64.433	62.5808	64.0234	63.3707	63.8833	64.8662	63.701	64.8407	65.5904	63.2874	63.2041	64.1714	62.6935	64.0891	64.3272	63.6108	64.0587	63.1443	63.8225
MgO	0.76244	0.90258	0.7889	0.72128	0.64974	0.8771	1.00842	0.7595	0.78106	0.7497	0.76832	0.7154	0.72912	0.66346	0.72128	0.71638	0.77028	0.77812	0.75754	0.7497	0.81928	0.69482	0.73304	0.79086	0.79184	0.7889	0.79086	0.78106	0.74284	0.7595	0.71638	0.74186	0.7644	0.71246	0.70462	0.76048	0.79184	0.75068	0.75754	0.784	0.74186	0.75264	0.70364
NiO	0	0.03822	0	0	0	0	0	0.02744	0	0	0	0	0	0	0.0441	0	0	0	0	0	0	0	0	0	0	0	0	0	0.03136	0	0	0	0	0	0	0	0	0.0245	0	0	0	0	0
CaO	0.21462	0.30772	0.18424	0.21756	1.0486	0.23814	0.21658	0.11564	0.11662	0.16758	0.25382	0.19698	0.3136	0.14014	0.10388	0.18326	0.1617	0.15288	0.10584	0.10486	0.13916	0.08624	0.0882	0.09212	0.1029	0.16464	0.09996	0.09604	0.13524	0.12054	0.10094	0.10094	0.1029	0.10094	0.12348	0.10878	0.18228	0.09114	0.1225	0.21364	0.18816	0.1568	0.147
Na2O	0	0	0	0.03038	0.03136	0	0.04214	0	0	0	0.0245	0	0	0	0	0	0	0	0	0	0	0	0	0	0	0.00294	0	0.0245	0	0	0	0	0	0	0	0	0	0	0	0	0	0.03234	0
Total	100.034	100.999	99.4151	99.6925	100.26	98.7918	99.8306	100.494	100.726	101.369	99.9571	100.919	100.65	99.7199	98.8732	101.069	100.482	100.673	99.9923	100.863	99.5602	100.104	100.323	100.278	101.107	99.0545	100.401	99.5876	99.6209	101.073	100.267	101.131	101.473	99.08	99.4671	100.918	99.2593	100.37	100.599	100.129	100.082	99.3387	99.7895
Si4+	0.987226	0.986734	1.00719	0.997283	0.997644	1.00053	0.986506	0.987169	0.983923	0.978814	0.97963	0.981116	0.980776	0.98829	0.985268	0.978482	0.987735	0.98466	0.98523	0.971693	0.987396	0.988668	0.975079	0.987185	0.976982	0.990662	0.979084	0.987527	0.989199	0.978516	0.989101	0.974571	0.970594	0.986767	0.988977	0.987172	0.997765	0.986179	0.982075	0.988133	0.986	0.986842	0.979399
Ti4+	0.00158028	0	0.00270456	0	0	0.0013738	0	0.000662652	0	0.00109543	0	0	0.00110281	0	0.0015721	0.00285727	0	0	0.00222028	0	0	0.00110932	0	0.00287772	0	0	0.00110579	0	0	0.000659174	0	0	0	0.00134472	0	0.00109988	0	0	0	0	0	0.00156345	0.00178095
Al3+	0.00321112	0.0171587	0.00392661	0.00787117	0.108009	0.00117411	0.00301318	0	0	0	0	0	0	0	0	0	0	0	0	0	0	0	0	0	0	0	0	0	0	0	0	0	0	0	0	0	0	0	0.00119102	0	0	0	0
Cr3+	0	0	0	0	0	0	0.000829276	0	0	0	0	0.000668218	0	0	0	0	0	0	0	0	0	0	0	0.00121508	0	0	0.000826524	0	0	0	0.000879333	0.00100065	0	0	0	0	0	0	0	0	0	0	0
V3+	0	0	0	0	0	0	0	0	0	0	0	0	0	0	0	0	0	0	0	0	0	0	0	0	0	0	0	0	0	0	0	0	0	0	0	0	0	0	0	0	0	0	0
Fe2+	0.619187	0.602155	0.600227	0.61275	0.535457	0.746004	0.368217	0.156461	0.162444	0.169451	0.170766	0.166915	0.160973	0.153352	0.152841	0.159677	0.165009	0.156788	0.154282	0.176374	0.175213	0.17286	0.168555	0.17504	0.173538	0.174183	0.168403	0.165897	0.150847	0.159413	0.1698	0.165577	0.154711	0.161494	0.170002	0.168073	0.167843	0.162721	0.162399	0.165737	0.156493	0.165492	0.1644
Mn2+	1.34302	1.33751	1.33972	1.3362	1.28788	1.19796	1.58066	1.81315	1.8108	1.8078	1.80059	1.80893	1.80984	1.82012	1.81895	1.8171	1.80326	1.81456	1.81668	1.81109	1.79136	1.79963	1.81673	1.79105	1.80675	1.78931	1.80771	1.80243	1.81705	1.81964	1.80096	1.81865	1.83345	1.81086	1.80123	1.8022	1.78807	1.80988	1.8124	1.79945	1.8138	1.80056	1.81394
Mg2+	0.0380725	0.0445195	0.0395863	0.0360972	0.0319501	0.0443059	0.0502803	0.0376966	0.0386776	0.0369075	0.0383258	0.0353754	0.0361359	0.033202	0.0363996	0.0353804	0.0382271	0.0385469	0.037794	0.0371114	0.0410229	0.0346394	0.0364791	0.0393383	0.0390796	0.0396999	0.0393018	0.0391	0.0371877	0.0374988	0.0356472	0.0366223	0.0376073	0.0358799	0.0353428	0.0375901	0.0397486	0.0373115	0.0375655	0.0390345	0.0369706	0.0377733	0.0351983
Ni2+	0	0.00101726	0	0	0	0	0	0.000734911	0	0	0	0	0	0	0.0012009	0	0	0	0	0	0	0	0	0	0	0	0	0	0.000847142	0	0	0	0	0	0	0	0	0.000657098	0	0	0	0	0
Ca2+	0.0077023	0.0109085	0.00664433	0.00782516	0.0370584	0.00864549	0.00776103	0.00412503	0.00415043	0.00592917	0.00909954	0.00700034	0.0111702	0.0050403	0.00376764	0.00650475	0.00576736	0.00544299	0.003795	0.00373056	0.00500787	0.00308995	0.00315449	0.00329317	0.00364983	0.00595452	0.00357013	0.00345532	0.00486579	0.00427726	0.00360986	0.00358123	0.00363841	0.00365341	0.00445131	0.00386437	0.00657609	0.00325568	0.0043658	0.00764468	0.00673916	0.00565572	0.00528486
Na+	0	0	0	0.0019774	0.00200561	0	0.00273268	0	0	0	0.00158947	0	0	0	0	0	0	0	0	0	0	0	0	0	0	0.000192421	0	0.00159513	0	0	0	0	0	0	0	0	0	0	0	0	0	0.00211094	0
Sum cat.	3	3	3	3	3	3	3	3	3	3	3	3	3	3	3	3	3	3	3	3	3	3	3	3	3	3	3	3	3	3	3	3	3	3	3	3	3	3	3	3	3	3	3
Tephroite	67.1416	67.4085	67.6786	67.3132	69.4167	60.2515	79.0663	90.3275	90.0035	89.7546	89.5958	89.9419	90.1787	90.7033	90.5766	90.306	89.8711	90.2814	90.4381	89.4553	89.2291	89.6619	89.8587	89.3101	89.4711	89.3229	89.6942	89.788	90.6221	90.2352	89.7605	89.9943	90.5064	90.1718	89.7664	89.7571	89.5978	90.0477	90.0632	89.783	90.3618	89.8561	90.0872
Fayalite	30.955	30.3478	30.3216	30.8683	28.8612	37.5202	18.4186	7.79456	8.07408	8.41298	8.49718	8.29919	8.02079	7.64213	7.61086	7.93564	8.22373	7.80079	7.68045	8.71166	8.72749	8.61229	8.337	8.7283	8.59368	8.69527	8.35574	8.26419	7.52322	7.90523	8.46287	8.19342	7.63716	8.04159	8.47224	8.37075	8.41043	8.09594	8.07007	8.2694	7.79636	8.2588	8.16473
Forsterite	1.90336	2.24372	1.99978	1.81846	1.72211	2.22836	2.51508	1.87797	1.92242	1.8324	1.90706	1.75891	1.80054	1.65458	1.81256	1.75833	1.90516	1.91785	1.88147	1.83304	2.04338	1.72582	1.80432	1.96159	1.93524	1.98183	1.95006	1.94777	1.85467	1.85955	1.77667	1.81223	1.85645	1.78664	1.76135	1.87214	1.99175	1.85638	1.86673	1.94761	1.84184	1.88506	1.74809
Chemical formulae calculated on the basis of 3 cations (apfu)

## Sheet: Pyrosmalite-(Mn)
Analysis	1	2	3	4	5	6	7	8	9	10	11	12	13	14	15	16	17	18	19	20	21	22	23	24	25	26	27	28	29	30	31	32	33	34	35	36	37	38	39	40	41	42	43	44	45	46	47	48	49
Location	veins																														inclusions in garnet		matrix
SiO2	33.427	33.539	33.322	33.59	33.66	33.439	33.635	33.662	33.566	33.477	33.581	33.67	33.572	33.479	33.575	33.294	33.655	33.609	33.263	33.457	33.616	33.906	33.235	33.588	33.737	33.354	33.459	33.508	33.687	33.597	33.811	33.726	33.54	33.901	33.449	33.582	33.48	33.574	33.467	33.833	33.757	33.737	33.328	33.545	33.578	33.905	33.717	33.494	33.616
TiO2	0	0	0.075	0	0.046	0	0	0	0	0.028	0	0	0.065	0	0	0	0.055	0	0	0	0	0	0	0.046	0	0.037	0	0.092	0	0.092	0	0	0	0.092	0	0.065	0	0	0	0.037	0	0	0	0	0	0	0	0	0
Al2O3	0	0	0	0	0	0.033	0	0	0	0	0	0.034	0.032	0.025	0	0	0	0	0	0.028	0	0.058	0	0	0	0	0	0.058	0.061	0	0	0	0.055	0.058	0.052	0.036	0	0.037	0	0.039	0.082	0.051	0.047	0	0.039	0.039	0.041	0	0.047
MgO	0.715	0.797	0.709	0.768	0.695	0.692	0.632	0.636	0.589	0.631	0.659	0.685	0.673	0.689	0.709	0.732	0.696	0.659	0.747	0.688	0.714	0.718	0.65	0.684	0.81	0.701	0.743	0.786	0.891	0.688	1.597	1.687	1.137	1.141	0.686	0.705	0.772	0.729	0.699	0.886	0.676	0.685	0.712	0.721	0.795	0.817	0.87	0.748	0.639
FeO	16.281	14.043	13.814	14.107	13.9	13.933	14.429	14.996	15.846	16.014	16.507	16.956	16.734	14.136	14.864	14.447	15.458	19.82	14.833	14.692	19.875	14.867	14.995	16.532	16.714	18.46	18.059	17.875	16.894	19.301	12.039	12.125	14.993	16.192	2.57	2.591	2.396	2.592	2.667	11.315	11.383	10.352	10.82	11.725	9.63	10.087	10.229	9.941	10.462
MnO	35.363	37.561	38.237	36.961	38.861	38.34	37.718	36.582	36.125	36.849	36.581	34.454	36.08	36.701	37.17	37.855	37.063	31.701	37.617	36.946	32.31	37.277	36.75	35.529	35.077	35.1	34.187	34.212	35.237	33.914	38.32	38.353	36.496	34.926	49.721	50.438	49.29	49.463	48.782	40.373	41.883	42.339	41.906	40.443	42.676	42.043	40.804	41.964	41.287
ZnO	0.05	0.032	0.049	0	0	0	0	0.032	0.029	0.068	0	0.056	0	0.048	0	0	0.025	0	0.041	0.034	0.037	0.029	0.055	0	0	0	0	0	0	0	0	0.063	0.049	0	0	0	0	0.059	0.027	0	0.055	0	0.063	0	0	0	0	0	0.053
NiO	0	0	0.047	0	0	0	0	0	0	0	0	0	0	0	0	0	0.028	0	0	0	0	0.03	0	0	0	0	0	0	0	0	0	0	0	0	0	0	0.03	0.037	0	0	0	0	0	0	0	0	0	0	0
Nb2O5	0.07	0.045	0.054	0	0.043	0.053	0.064	0.065	0.047	0.059	0.056	0.049	0	0.046	0.065	0.052	0.055	0	0.038	0.055	0.035	0.038	0.074	0	0.04	0.076	0.056	0.026	0.078	0.064	0.045	0.051	0.042	0.056	0.042	0.089	0.027	0.086	0.059	0.078	0	0.069	0.058	0.043	0	0.061	0.04	0	0.043
H2O*	7.5147	7.58588	7.6544	7.63927	7.66082	7.73097	7.62178	7.5463	7.45766	7.51244	7.57834	7.57985	7.65772	7.54558	7.59026	7.53404	7.6234	7.53571	7.5973	7.56627	7.65369	7.64274	7.59131	7.63875	7.49075	7.53274	7.45476	7.52382	7.57131	7.56661	7.65877	7.67387	7.6836	7.8154	7.70201	7.82468	7.74531	7.7596	7.69041	7.77863	7.84604	7.78003	7.74895	7.71155	7.75807	7.83945	7.69055	7.71722	7.66727
Cl	3.395	3.18	2.97	2.763	3.303	2.822	3.173	3.294	3.703	3.815	3.679	3.134	3.276	3.062	3.269	3.485	3.369	3.246	3.294	3.186	3.075	3.292	2.991	3.077	3.696	3.931	3.828	3.602	3.553	3.772	3.125	3.133	3.049	2.697	2.971	2.838	2.643	2.781	2.733	2.68	2.822	2.855	2.857	2.857	2.797	2.599	2.719	2.728	2.935
-O=Cl	-0.766037	-0.717525	-0.670141	-0.623434	-0.745278	-0.636747	-0.715945	-0.743247	-0.835533	-0.860804	-0.830118	-0.707146	-0.739186	-0.6909	-0.737607	-0.786344	-0.76017	-0.732417	-0.743247	-0.718879	-0.693833	-0.742796	-0.67488	-0.694284	-0.833953	-0.886978	-0.863738	-0.812744	-0.801687	-0.851102	-0.705115	-0.70692	-0.687966	-0.608542	-0.670367	-0.640357	-0.596358	-0.627496	-0.616665	-0.604707	-0.636747	-0.644193	-0.644644	-0.644644	-0.631106	-0.58643	-0.613506	-0.615537	-0.662244
Total	96.0497	96.0654	96.2613	95.2048	97.4235	96.4062	96.5568	96.0701	96.5271	97.5926	97.8112	95.9107	97.3505	95.0407	96.5047	96.6127	97.2672	95.8383	96.6871	95.9334	96.6219	97.1149	95.6664	96.4005	96.7308	98.3048	96.923	96.8701	97.1706	98.1435	95.8907	96.105	96.3566	96.2699	96.5226	97.5283	95.787	96.4901	95.5077	96.4149	97.8673	97.2238	96.8953	96.4009	96.642	96.804	95.497	95.9767	96.087
Si4+	5.98222	5.99042	5.94094	6.03734	5.93693	5.9343	5.98325	6.02001	5.99192	5.91738	5.91391	6.02654	5.92835	6.0302	5.97763	5.92855	5.9505	6.02691	5.91268	5.98869	5.9749	5.99504	5.9664	5.98015	6.00007	5.86125	5.95237	5.95286	5.95991	5.90847	5.99692	5.96974	5.94497	5.97901	5.92983	5.89149	5.96356	5.94544	5.98401	5.996	5.91023	5.94675	5.89585	5.96054	5.94437	5.98031	6.03117	5.97065	5.99052
Ti4+	0	0	0.010058	0	0.00610285	0	0	0	0	0.00372279	0	0	0.00863371	0	0	0	0.00731466	0	0	0	0	0	0	0.00616046	0	0.0048907	0	0.012294	0	0.01217	0	0	0	0.0122048	0	0.00857747	0	0	0	0.00493231	0	0	0	0	0	0	0	0	0
Al3+	0	0	0	0	0	0.00690216	0	0	0	0	0	0.00717231	0.00665981	0.00530706	0	0	0	0	0	0.00590687	0	0.0120864	0	0	0	0	0	0.012144	0.0127193	0	0	0	0.0114896	0.0120559	0.0108647	0.00744347	0	0.00772213	0	0.00814593	0.0169203	0.0105949	0.00979918	0	0.00813711	0.00810736	0.00864353	0	0.00987122
Fe2+	2.43669	2.09759	2.05967	2.12043	2.0503	2.06783	2.14652	2.24278	2.36559	2.36721	2.4311	2.53806	2.47122	2.12931	2.21311	2.15136	2.28566	2.97233	2.20499	2.19927	2.95424	2.19833	2.25122	2.46154	2.4859	2.71286	2.68673	2.65569	2.49956	2.83863	1.78572	1.79484	2.22243	2.3882	0.381018	0.380137	0.356911	0.383857	0.398798	1.67699	1.66668	1.52599	1.60073	1.7423	1.42571	1.48791	1.53017	1.48197	1.55915
Mg2+	0.190758	0.212215	0.188443	0.205782	0.182744	0.183077	0.1676	0.169561	0.156744	0.166274	0.173012	0.182779	0.177167	0.185007	0.188179	0.194314	0.183453	0.176171	0.197949	0.183588	0.189188	0.189256	0.173957	0.18155	0.214756	0.183642	0.19705	0.208166	0.234999	0.180374	0.422265	0.44516	0.30044	0.299994	0.181298	0.184382	0.204997	0.19245	0.186322	0.234081	0.17644	0.180001	0.187771	0.190987	0.209811	0.214829	0.231997	0.198777	0.169758
Mn2+	5.3604	5.68235	5.77418	5.62681	5.80557	5.76304	5.68299	5.54124	5.46207	5.51686	5.45657	5.22334	5.39643	5.59913	5.60517	5.70938	5.55044	4.81499	5.66357	5.60138	4.86412	5.58264	5.58801	5.3579	5.28391	5.22435	5.15134	5.148	5.28031	5.05169	5.75676	5.75007	5.47917	5.21733	7.46589	7.49479	7.43638	7.41898	7.38786	6.06031	6.211	6.32116	6.27908	6.08673	6.39908	6.28111	6.18213	6.33599	6.23182
Zn2+	0.00660665	0.00421992	0.0064501	0	0	0	0	0.00422526	0.00382218	0.00887439	0	0.00740048	0	0.00638333	0	0	0.00326355	0	0.00538088	0.00449335	0.00485549	0.00378582	0.00728998	0	0	0	0	0	0	0	0	0.00823337	0.00641253	0	0	0	0	0.00771399	0.0035644	0	0.00710967	0	0.00822856	0	0	0	0	0	0.00697334
Ni2+	0	0	0.00674069	0	0	0	0	0	0	0	0	0	0	0	0	0	0.0039824	0	0	0	0	0.00426697	0	0	0	0	0	0	0	0	0	0	0	0	0	0	0.00429857	0.00527066	0	0	0	0	0	0	0	0	0	0	0
Ca2+	0.0159154	0.00956867	0.00916936	0.00962897	0.0120949	0.0380295	0.0144855	0.0139879	0.0160664	0.0149618	0.0209449	0.0107396	0.0115415	0.0409138	0.0106826	0.0122106	0.0109877	0.0096069	0.0123797	0.00920576	0.00723673	0.0115563	0.00711693	0.00934756	0.00990895	0.00696656	0.00800571	0.00875607	0.00625555	0	0.0317366	0.0278793	0.0317159	0.0867368	0.0277323	0.0261281	0.0316812	0.0316863	0.034676	0.0132921	0.0116307	0.0100097	0.0109936	0.0159923	0.0108118	0.0228675	0.0126494	0.0126059	0.0284498
Ba2+	0.00175327	0	0	0	0.00283384	0.00257313	0	0.0029434	0	0	0	0	0	0	0	0	0	0	0	0.00301617	0.00264674	0	0	0.00334898	0.0022302	0	0	0	0	0.00358361	0.00298869	0	0	0	0	0	0	0	0	0	0	0	0.00291158	0	0.00208121	0	0	0	0
Nb5+	0.00566351	0.00363364	0.00435251	0	0.00342877	0.00425221	0.00514693	0.00525524	0.00379303	0.00471474	0.00445853	0.00396501	0	0.00374576	0.00523177	0.00418609	0.00439632	0	0.00305372	0.00445071	0.00281239	0.00303754	0.0060058	0	0.00321612	0.00603779	0.00450388	0.0020882	0.00623871	0.00508835	0.00360832	0.00408116	0.00336557	0.00446506	0.00336613	0.0070588	0.00217423	0.00688496	0.00476925	0.0062494	0	0.00549851	0.0046386	0.00345421	0	0.00486421	0.00323471	0	0.00346425
Sum cat.	14	14	14	14	14	14	14	14	14	14	14	14	14	14	14	14	14	14	14	14	14	14	14	14	14	14	14	14	14	14	14	14	14	14	14	14	14	14	14	14	14	14	14	14	14	14	14	14	14
Cl-	1.0297	0.962588	0.8974	0.841633	0.98733	0.848749	0.956581	0.998358	1.12028	1.14284	1.09804	0.950671	0.980408	0.934696	0.986356	1.0517	1.00951	0.986492	0.992322	0.966487	0.926266	0.986464	0.909995	0.928457	1.11401	1.17071	1.15413	1.08449	1.06532	1.12422	0.939346	0.939846	0.915904	0.806127	0.892622	0.843794	0.797853	0.834618	0.828174	0.804937	0.837343	0.852874	0.856551	0.860347	0.839169	0.776913	0.824267	0.824148	0.886405
OH-	8.9703	9.03741	9.1026	9.15837	9.01267	9.15125	9.04342	9.00164	8.87972	8.85716	8.90196	9.04933	9.01959	9.0653	9.01364	8.9483	8.99049	9.01351	9.00768	9.03351	9.07373	9.01354	9.09	9.07154	8.88599	8.82929	8.84587	8.91551	8.93468	8.87578	9.06065	9.06015	9.0841	9.19387	9.10738	9.15621	9.20215	9.16538	9.17183	9.19506	9.16266	9.14713	9.14345	9.13965	9.16083	9.22309	9.17573	9.17585	9.11359
Suma an.	10	10	10	10	10	10	10	10	10	10	10	10	10	10	10	10	10	10	10	10	10	10	10	10	10	10	10	10	10	10	10	10	10	10	10	10	10	10	10	10	10	10	10	10	10	10	10	10	10
Chemical formulae calculated on the basis of 14 cations (apfu), symbol * represents calculation of H2O from (OH)-
[truncated: 3 more columns]

## Sheet: Amphiboles
Analysis	1	2	3	4	5	6	7	8	9	10	11	12	13	14	15	16	17	18	19	20	21	22	23	24	25	26	27	28	29	30	31	32	33	34	35	36	37	38	39	40	41	42	43	44	45	46	47	48	49
Mineral	Clino-suenoite
SiO2	53.236	53.364	53.465	53.691	51.746	52.247	52.699	52.412	52.074	51.854	52.403	51.76	52.354	52.007	51.935	51.741	54.058	54.277	54.039	53.083	54.058	53.598	53.79	52.159	54.16	51.971	51.822	54.06	52.929	52.678	53.561	52.29	53.273	53.147	53.14	53.158	53.155	52.734	52.772	52.235	52.321	52.353	52.415	53.153	53.466	53.647	53.837	53.901	53.146
TiO2	0	0	0	0	0	0	0	0	0	0	0.03	0	0	0	0	0	0.027	0.043	0	0.04	0.043	0.037	0.026	0.057	0	0	0.053	0	0	0	0	0	0	0	0	0	0	0	0	0	0	0	0	0.029	0	0	0	0	0
Al2O3	0.046	0.027	0	0	0.024	0	0	0.041	0.037	0.027	0	0	0.056	0.05	0.04	0.026	0.14	0.131	0.128	0.044	0.094	0.084	0.093	0	0.083	0	0	0.057	0.027	0	0	0.026	0	0.028	0	0.09	0.037	0.041	0.031	0	0	0.039	0.083	0	0.029	0.048	0.119	0.096	0.047
Fe2O3*	0.716	0	0	0	0	0.78	0	0	0	0.289	0	0.66	0.123	0	0.742	0.671	0.568	0	0	0	0.424	0	0.49	0	0	0.551	0.006	0	0	0.695	0.073	0	1.067	0	0	0	0.675	0.484	0	0.347	0	0.49	0	0.133	1.626	0.048	0.477	0.54	0
FeO	12.786	11.928	10.956	11.743	17.899	17.24	16.68	17.311	17.46	17.94	17.801	17.678	18.262	18.163	18.239	17.922	9.894	9.723	11.111	15.832	12.607	14.57	11.172	18.581	11.456	18.576	18.166	11.912	12.694	12.223	10.648	14.958	10.234	10.659	12.178	11.661	11.071	10.858	11.611	13.323	12.66	11.53	10.536	10.964	9.783	10.438	10.365	10.138	12.271
MnO	15.24	15.74	16.031	15.372	15.272	15.41	15.175	15.142	15.587	15.529	14.929	15.73	15.611	15.142	15.671	15.505	14.62	14.211	13.568	13.368	13.408	13.08	14.303	14.886	12.116	15.488	14.959	12.787	16.379	16.607	16.363	16.557	16.766	15.79	16.549	15.354	16.308	16.534	15.24	16.793	16.225	16.097	13.576	15.791	16.546	14.679	13.723	13.843	16.756
MgO	14.326	14.608	14.827	14.556	10.738	11.533	11.858	11.558	10.855	10.94	11.314	10.895	11.001	10.729	10.661	10.808	16.056	16.131	15.637	13.212	15.509	14.275	15.387	11.062	16.113	10.677	11.116	15.868	13.104	13.369	14.544	11.287	14.522	14.714	13.763	13.877	14.159	14.376	13.978	12.858	13.277	14.045	15.224	15.026	15.368	15.379	15.98	16.067	13.233
CoO	0.058	0.055	0.063	0.032	0.08	0.053	0.101	0.058	0.083	0.086	0.077	0	0.051	0.064	0.057	0.046	0	0	0	0.038	0.036	0.066	0.036	0.031	0.039	0.036	0.046	0.051	0	0	0.043	0.056	0	0	0	0	0	0.03	0.026	0.028	0.043	0	0.038	0	0.032	0	0	0	0.04
NiO	0.034	0.055	0	0	0	0	0	0	0.052	0.039	0.075	0	0.028	0.04	0.06	0.115	0	0.039	0.058	0.09	0.074	0	0.064	0	0	0	0	0.13	0.079	0	0	0.027	0	0.029	0.047	0.061	0	0.032	0	0	0	0.04	0	0.031	0	0	0.06	0.038	0.044
ZnO	0.192	0	0.133	0.225	0.124	0.261	0.22	0.145	0.157	0.194	0.128	0.223	0.211	0	0.074	0.049	0	0.1	0.042	0.033	0.025	0.17	0	0	0.087	0.169	0.091	0.046	0.092	0	0.088	0.067	0.097	0.038	0	0.042	0.126	0	0.071	0.029	0.029	0.059	0.029	0.076	0.088	0	0.088	0.051	0.117
CaO	1.279	1.282	1.524	1.54	0.729	0.699	0.884	0.86	0.635	0.605	0.84	0.671	0.64	0.68	0.758	0.762	2.509	2.366	2.404	1.664	2.03	1.865	2.354	0.626	2.965	0.676	0.642	2.272	1.996	1.719	2.126	1.354	1.945	1.648	1.405	2.157	2.057	1.428	1.454	1.037	1.128	1.393	2.364	1.38	1.377	2.505	2.619	2.674	1.542
Na2O	0	0.029	0	0.02	0.021	0.034	0	0	0.033	0	0.052	0.026	0	0.04	0.026	0.025	0	0.036	0.024	0	0	0.035	0.057	0.02	0.02	0	0.042	0.039	0	0	0.024	0.027	0	0	0.059	0.037	0	0.021	0	0	0	0	0.022	0.018	0.033	0.052	0.044	0.044	0.025
H2O**	2.006	1.854	2.002	2.005	1.935	1.969	1.969	1.792	1.682	1.948	1.961	1.949	1.965	1.942	1.743	1.949	2.038	1.924	2.022	1.956	1.886	2.01	1.932	1.776	1.995	1.956	1.942	2.025	1.953	1.92	1.89	1.95	2.012	1.908	1.921	1.949	1.927	1.984	1.928	1.899	1.956	1.907	1.851	1.87	1.968	1.9	1.866	1.965	1.875
F	0	0.307	0	0	0	0	0	0.359	0.554	0	0	0	0	0	0.453	0	0	0.224	0	0.067	0.315	0	0.197	0.371	0.072	0	0	0	0.065	0.136	0.249	0	0	0.165	0.144	0.078	0.159	0	0.077	0.134	0	0.133	0.236	0.263	0.125	0.233	0.339	0.136	0.236
-O=F	0	-0.13	0	0	0	0	0	-0.15	-0.23	0	0	0	0	0	-0.19	0	0	-0.09	0	-0.03	-0.13	0	-0.08	-0.16	-0.03	0	0	0	-0.03	-0.06	-0.1	0	0	-0.07	-0.06	-0.03	-0.07	0	-0.03	-0.06	0	-0.06	-0.1	-0.11	-0.05	-0.1	-0.14	-0.06	-0.1
Total	99.923	99.115	98.999	99.189	98.573	100.227	99.587	99.526	98.977	99.453	99.609	99.593	100.307	98.855	100.266	99.62	99.912	99.111	99.031	99.401	100.383	99.79	99.819	99.413	99.081	100.104	98.883	99.252	99.285	99.287	99.509	98.599	99.914	98.058	99.145	98.435	99.607	98.518	97.16	98.624	97.643	98.029	96.273	98.624	100.393	98.829	99.381	99.438	99.237
Si4+	7.956	8.004	8.008	8.03	8.02	7.955	8.023	8.01	8.031	7.981	8.013	7.962	7.988	8.03	7.954	7.959	7.953	8.016	8.015	8.007	7.964	7.997	7.962	8.011	8.005	7.968	8	8.005	7.998	7.96	7.997	8.04	7.94	8.022	8.009	8.025	7.959	7.969	8.055	7.98	8.021	7.969	8.006	7.989	7.907	7.999	7.963	7.962	8.021
Al3+	0.008	0	0	0	0	0	0	0	0	0.005	0	0	0.01	0	0.007	0.005	0.024	0	0	0	0.016	0.003	0.016	0	0	0	0	0	0.002	0	0	0	0	0	0	0	0.007	0.007	0	0	0	0.007	0	0	0.005	0.001	0.021	0.017	0
Ti4+	0	0	0	0	0	0	0	0	0	0	0	0	0	0	0	0	0.003	0	0	0	0.005	0	0.003	0	0	0	0	0	0	0	0	0	0	0	0	0	0	0	0	0	0	0	0	0.003	0	0	0	0	0
Fe3+	0.036	0	0	0	0	0.045	0	0	0	0.014	0	0.038	0.002	0	0.039	0.036	0.019	0	0	0	0.015	0	0.019	0	0	0.032	0	0	0	0.04	0.003	0	0.06	0	0	0	0.035	0.024	0	0.02	0	0.025	0	0.008	0.088	0	0.016	0.022	0
Sum T	8	8.004	8.008	8.03	8.02	8	8.023	8.01	8.031	8	8.013	8	8	8.03	8	8	7.999	8.016	8.015	8.007	8	8	8	8.011	8.005	8	8	8.005	8	8	8	8.04	8	8.022	8.009	8.025	8.001	8	8.055	8	8.021	8.001	8.006	8	8	8	8	8.001	8.021
Ti4+	0	0	0	0	0	0	0	0	0	0	0.003	0	0	0	0	0	0	0.005	0	0.005	0	0.004	0	0.007	0	0	0.006	0	0	0	0	0	0	0	0	0	0	0	0	0	0	0	0	0	0	0	0	0	0
Al3+	0	0.005	0	0	0.004	0	0	0.007	0.007	0	0	0	0	0.009	0	0	0	0.023	0.022	0.008	0	0.012	0	0	0.014	0	0	0.01	0.003	0	0	0.005	0	0.005	0	0.016	0	0	0.006	0	0	0	0.015	0	0	0.007	0	0	0.008
Fe3+	0.044	0	0	0	0	0.045	0	0	0	0.019	0	0.038	0.012	0	0.046	0.041	0.044	0	0	0	0.032	0	0.035	0	0	0.032	0.001	0	0	0.04	0.005	0	0.06	0	0	0	0.041	0.031	0	0.02	0	0.031	0	0.008	0.093	0.005	0.037	0.038	0
Co2+	0.007	0.007	0.008	0.004	0.01	0.006	0.012	0.007	0.01	0.011	0.009	0	0.006	0.008	0.007	0.006	0	0	0	0.005	0.004	0.008	0.004	0.004	0.005	0.004	0.006	0.006	0	0	0.005	0.007	0	0	0	0	0	0.004	0.003	0.003	0.005	0	0.005	0	0.004	0	0	0	0.005
Ni2+	0.004	0.007	0	0	0	0	0	0	0.006	0.005	0.009	0	0.003	0.005	0.007	0.014	0	0.005	0.007	0.011	0.009	0	0.008	0	0	0	0	0.015	0.01	0	0	0.003	0	0.004	0.006	0.007	0	0.004	0	0	0	0.005	0	0.004	0	0	0.007	0.005	0.005
Zn2+	0.021	0	0.015	0.025	0.014	0.029	0.025	0.016	0.018	0.022	0.014	0.025	0.024	0	0.008	0.006	0	0.011	0.005	0.004	0.003	0.019	0	0	0.009	0.019	0.01	0.005	0.01	0	0.01	0.008	0.011	0.004	0	0.005	0.014	0	0.008	0.003	0.003	0.007	0.003	0.008	0.01	0	0.01	0.006	0.013
Mn2+	0.134	0.22	0.295	0.257	0.171	0.106	0.148	0.124	0.211	0.124	0.108	0.164	0.122	0.163	0.161	0.149	0.217	0.205	0.131	0	0	0	0.175	0.07	0.005	0.122	0.074	0	0.421	0.404	0.414	0.467	0.427	0.331	0.367	0.376	0.398	0.351	0.321	0.343	0.334	0.302	0.165	0.235	0.296	0.267	0.141	0.161	0.442
Fe2+	1.598	1.496	1.372	1.469	2.32	2.195	2.124	2.212	2.252	2.309	2.276	2.274	2.33	2.345	2.336	2.306	1.217	1.201	1.378	1.997	1.547	1.783	1.383	2.387	1.416	2.382	2.345	1.461	1.604	1.545	1.33	1.924	1.276	1.345	1.535	1.472	1.386	1.372	1.482	1.702	1.623	1.468	1.346	1.378	1.21	1.302	1.282	1.252	1.549
Mg2+	3.192	3.266	3.311	3.245	2.481	2.618	2.691	2.633	2.496	2.51	2.579	2.498	2.502	2.47	2.434	2.478	3.522	3.551	3.457	2.971	3.406	3.175	3.395	2.533	3.55	2.44	2.558	3.503	2.952	3.012	3.237	2.587	3.227	3.311	3.092	3.123	3.16	3.239	3.181	2.928	3.034	3.187	3.466	3.367	3.388	3.418	3.524	3.538	2.977
Sum C	5	5.001	5.001	5	5	4.999	5	4.999	5	5	4.998	4.999	4.999	5	4.999	5	5	5.001	5	5.001	5.001	5.001	5	5.001	4.999	4.999	5	5	5	5.001	5.001	5.001	5.001	5	5	4.999	4.999	5.001	5.001	4.999	4.999	5	5	5	5.001	4.999	5.001	5	4.999
Mn2+	1.795	1.78	1.739	1.69	1.834	1.881	1.809	1.836	1.825	1.9	1.825	1.886	1.895	1.817	1.872	1.871	1.604	1.573	1.574	1.708	1.673	1.653	1.619	1.866	1.511	1.889	1.881	1.604	1.676	1.722	1.656	1.69	1.689	1.688	1.746	1.587	1.67	1.766	1.65	1.83	1.773	1.773	1.591	1.775	1.777	1.587	1.579	1.571	1.7
Fe2+	0	0	0	0	0	0	0	0	0	0	0	0	0	0	0	0	0	0	0	0	0.007	0.035	0	0	0	0	0	0.015	0	0	0	0	0	0	0	0	0	0	0	0	0	0	0	0	0	0	0	0	0
Ca2+	0.205	0.206	0.245	0.247	0.121	0.114	0.144	0.141	0.105	0.1	0.138	0.111	0.105	0.112	0.124	0.126	0.396	0.374	0.382	0.269	0.32	0.298	0.373	0.103	0.47	0.111	0.106	0.36	0.323	0.278	0.34	0.223	0.311	0.267	0.227	0.349	0.33	0.231	0.238	0.17	0.185	0.227	0.387	0.222	0.218	0.4	0.415	0.423	0.249
Na+	0	0.008	0	0.006	0.006	0.005	0	0	0.01	0	0.015	0.004	0	0.012	0.004	0.004	0	0.01	0.007	0	0	0.01	0.008	0.006	0.006	0	0.012	0.011	0	0	0.004	0.008	0	0	0.017	0.011	0	0.003	0	0	0	0	0.007	0.003	0.005	0.013	0.006	0.006	0.007
Sum B	2	1.994	1.984	1.943	1.961	2	1.953	1.977	1.94	2	1.978	2.001	2	1.941	2	2.001	2	1.957	1.963	1.977	2	1.996	2	1.975	1.987	2	1.999	1.99	1.999	2	2	1.921	2	1.955	1.99	1.947	2	2	1.888	2	1.958	2	1.985	2	2	2	2	2	1.956
Na+	0	0	0	0	0	0.005	0	0	0	0	0	0.004	0	0	0.004	0.004	0	0	0	0	0	0	0.008	0	0	0	0	0	0	0	0.003	0	0	0	0	0	0	0.003	0	0	0	0	0	0.003	0.005	0.002	0.006	0.006	0
Sum A	0	0	0	0	0	0.005	0	0	0	0	0	0.004	0	0	0.004	0.004	0	0	0	0	0	0	0.008	0	0	0	0	0	0	0	0.003	0	0	0	0	0	0	0.003	0	0	0	0	0	0.003	0.005	0.002	0.006	0.006	0
(OH)-	2	1.854	2	2	2	2	2	1.826	1.73	2	2	2	2	2	1.781	2	2	1.895	2	1.968	1.853	2	1.908	1.82	1.966	2	2	2	1.969	1.935	1.882	2	2	1.921	1.931	1.963	1.925	2	1.963	1.935	2	1.936	1.886	1.875	1.942	1.89	1.841	1.936	1.887
F-	0	0.146	0	0	0	0	0	0.174	0.27	0	0	0	0	0	0.219	0	0	0.105	0	0.032	0.147	0	0.092	0.18	0.034	0	0	0	0.031	0.065	0.118	0	0	0.079	0.069	0.037	0.075	0	0.037	0.065	0	0.064	0.114	0.125	0.058	0.11	0.159	0.064	0.113
Sum W	2	2	2	2	2	2	2	2	2	2	2	2	2	2	2	2	2	2	2	2	2	2	2	2	2	2	2	2	2	2	2	2	2	2	2	2	2	2	2	2	2	2	2	2	2	2	2	2	2
Sum total	15	14.999	14.993	14.973	14.981	15.004	14.976	14.986	14.971	15	14.989	15.004	14.999	14.971	15.003	15.005	14.999	14.974	14.978	14.985	15.001	14.997	15.008	14.987	14.991	14.999	14.999	14.995	14.999	15.001	15.004	14.962	15.001	14.977	14.999	14.971	15	15.004	14.944	14.999	14.978	15.001	14.991	15.003	15.006	15.001	15.007	15.007	14.976
Chemical formulae calculated on the basis of 15 cations (apfu), (OH)- calculated as F+OH+Cl= 2 anions (apfu), symbol * represents calculation of Fe2O3 from charge balance, symbol ** represents calculation of H2O from (OH)-
[truncated: 76 more columns]

## Sheet: Caryopilite-greenalite
Analysis	1	2	3	4	5	6	7	8	9	10	11	12	13	14	15	16	17	18	19	20	21	22	23	24	25	26	27	28
Mineral	Caryopilite														Greenalite
SiO2	36.74	36.691	36.41	36.72	36.299	37.038	36.555	36.841	36.796	36.564	37.603	37.399	37.494	37.239	35.685	35.628	35.521	35.515	35.84	35.477	35.29	35.719	35.557	35.766	35.281	35.613	35.585	35.407
Al2O3	0.549	0.507	0.604	0.517	0.594	0.622	0.573	0.654	0.622	0.668	0.294	0.282	0.281	0.224	0.912	0.981	1.012	1.041	0.92	1.001	1.045	0.902	0.959	1.029	1.069	1.125	0.865	0.883
FeO	15.151	14.451	14.518	14.276	14.241	14.669	14.803	14.65	15.123	14.901	13.194	13.665	13.084	12.257	29.809	29.635	28.547	24.66	24.849	24.358	24.746	24.114	24.321	24.388	24.639	24.853	24.813	24.962
MnO	36.601	37.199	37.393	37.876	37.91	37.269	36.069	36.679	36.952	37.151	38.808	38.192	38.615	39.005	24.245	23.968	24.024	23.368	24.093	24.247	23.808	24.169	24.238	24.379	24.643	23.939	23.934	24.226
MgO	1.573	1.442	1.634	1.401	1.646	1.429	1.576	1.643	1.669	1.669	1.444	1.531	1.606	1.508	2.775	2.851	2.848	2.885	2.804	2.969	2.88	2.676	2.744	2.921	2.787	2.799	2.656	2.67
CaO	0.153	0.139	0.268	0.145	0.258	0.192	0.234	0.269	0.188	0.156	0.278	0.352	0.237	0.436	0.095	0.053	0.062	0.081	0.096	0.075	0.107	0.08	0.078	0.112	0.095	0.108	0.064	0.071
Na2O	0	0	0	0.038	0	0.043	0.02	0	0	0	0	0	0.02	0.02	0.042	0.038	0.024	0.018	0.037	0.029	0.018	0.034	0	0	0.026	0	0.036	0
K2O	0	0	0	0.016	0	0	0	0	0	0	0	0	0	0	0.031	0	0	0.016	0	0	0	0.038	0.015	0.03	0.015	0.03	0	0
F	0	0	0	0	0	0	0	0	0	0	0	0	0	0	0	0	0	0	0	0	0	0	0	0	0	0	0	0
Cl	0.365	0.384	0.378	0.423	0.406	0.398	0.379	0.379	0.37	0.379	0.422	0.374	0.397	0.405	0.052	0.052	0.055	0	0	0	0	0	0	0	0	0	0	0
Suma	91.132	90.813	91.205	91.412	91.354	91.66	90.209	91.115	91.72	91.488	92.043	91.795	91.734	91.094	93.646	93.206	92.093	87.584	88.639	88.156	87.894	87.732	87.912	88.625	88.555	88.467	87.953	88.219
Si4+	4.26391	4.27458	4.23288	4.2604	4.2209	4.27171	4.27642	4.26632	4.24593	4.23431	4.31225	4.30112	4.30962	4.31235	4.07012	4.07449	4.09672	4.22434	4.22311	4.20324	4.19716	4.24497	4.22357	4.21169	4.17806	4.2045	4.22966	4.20703
Al3+	0.0750924	0.0696139	0.0827575	0.0706957	0.0814051	0.0845471	0.0790029	0.0892595	0.0845897	0.0911717	0.039736	0.0382231	0.0380661	0.0305716	0.122595	0.132223	0.137558	0.145933	0.127764	0.139774	0.146479	0.126339	0.134254	0.142809	0.149199	0.156536	0.121174	0.123652
Fe2+	1.4705	1.40794	1.41148	1.38519	1.38486	1.41484	1.44823	1.41877	1.45936	1.4431	1.26535	1.31427	1.25768	1.18701	2.8433	2.83427	2.75338	2.45298	2.44865	2.41342	2.46129	2.39661	2.41596	2.40169	2.44012	2.4538	2.46644	2.48039
Mn2+	3.59787	3.67069	3.68204	3.72216	3.73376	3.6407	3.57397	3.59768	3.61154	3.64403	3.76952	3.72029	3.75938	3.82577	2.34222	2.32165	2.34682	2.35425	2.40458	2.4332	2.39833	2.43286	2.43856	2.43156	2.47178	2.39384	2.40955	2.4381
Mg2+	0.27215	0.250443	0.28319	0.242324	0.285332	0.245695	0.274853	0.283642	0.287104	0.288135	0.246865	0.262487	0.27519	0.260332	0.471841	0.48606	0.489669	0.511569	0.492553	0.524394	0.510631	0.474102	0.485902	0.512777	0.492018	0.492629	0.470627	0.472942
Ca2+	0.0190254	0.0173509	0.0333829	0.0180256	0.0321443	0.0237262	0.0293308	0.0333771	0.0232436	0.0193565	0.0341586	0.0433749	0.0291877	0.0540974	0.0116097	0.00649429	0.00766156	0.010323	0.0121202	0.00952078	0.0136352	0.0101868	0.00992711	0.0141312	0.012054	0.0136617	0.00815065	0.00903896
Na+	0	0	0	0.00854822	0	0.00961538	0.00453637	0	0	0	0	0	0.00445709	0.00449045	0.00928785	0.00842577	0.0053667	0.00415111	0.008453	0.00666161	0.00415069	0.00783426	0	0	0.00596968	0	0.00829631	0
K+	0	0	0	0.00236826	0	0	0	0	0	0	0	0	0	0	0.0045107	0	0	0.00242789	0	0	0	0.00576129	0.00227304	0.0045068	0.00226613	0.00451844	0	0
Sum oct.	5.43463	5.41604	5.49286	5.44931	5.5175	5.41912	5.40992	5.42273	5.46585	5.4858	5.35563	5.37865	5.36396	5.36227	5.80536	5.78912	5.74045	5.48163	5.49412	5.52697	5.53452	5.45369	5.48688	5.50747	5.5734	5.51498	5.48425	5.52412
Cl-	0.0717906	0.0758177	0.0744754	0.0831752	0.0800096	0.0777934	0.0751413	0.0743819	0.0723569	0.074383	0.0820162	0.0728952	0.0773345	0.0794834	0.0100515	0.0100784	0.0107503	0	0	0	0	0	0	0	0	0	0	0
(OH)-	7.92821	7.92418	7.92552	7.91682	7.91999	7.92221	7.92486	7.92562	7.92764	7.92562	7.91798	7.9271	7.92267	7.92052	7.98995	7.98992	7.98925	8	8	8	8	8	8	8	8	8	8	8
Sum an.	8	8	8	8	8	8	8	8	8	8	8	8	8	8	8	8	8	8	8	8	8	8	8	8	8	8	8	8
R/Si	1.2701	1.26298	1.28978	1.27227	1.29957	1.2608	1.25714	1.26323	1.28184	1.29099	1.23404	1.24044	1.23684	1.22988	1.42009	1.41716	1.39805	1.29363	1.29609	1.31108	1.3144	1.27914	1.29622	1.30324	1.32911	1.30736	1.29273	1.31092
#Fe	0.290133	0.277229	0.277113	0.271215	0.270553	0.27986	0.288366	0.282824	0.287792	0.283677	0.251318	0.26105	0.250681	0.236796	0.542463	0.510269	0.504541	0.497959	0.506477	0.496248	0.497672	0.496909	0.496777	0.506184	0.505834	0.504299	0.551344	0.55285
Chemical formulae calculated on the basis of 14 anions (apfu)

## Sheet: Chlorite gr.
Analysis	MH-19 chl 6	MH-19 chl 7	MH-19 chl 8	MH-19 chl 10	MH-19 chl 11	MH-19 chl 12	MH-15_car25	MH-15_car28	MH-15_car35	MH-15_car36	MH-15_car37	MH-15_car38	MH-15_car39	MH-15_car40	MH-15 chl102	MH-15 chl103
SiO2	26.0487	25.4698	25.474	25.7315	26.1466	25.6934	25.3544	25.7113	25.6221	27.3273	27.4271	25.9046	27.5573	27.0827	26.086	24.835
TiO2	0.0618	0	0	0.1133	0.0515	0	0	0	0	0	0	0	0	0	0.038	0
Al2O3	21.7536	22.1502	22.2645	22.3819	21.9771	22.8052	17.9823	16.6015	17.053	14.4449	13.964	15.6345	14.4837	14.7441	15.79	16.908
Cr2O3	0	0.07416	0.04429	0.03914	0.04532	0	0	0	0	0	0	0	0	0	0.045	0
FeO	21.1033	24.6578	23.7865	23.068	21.0207	22.5128	34.942	35.4403	34.6818	35.4297	35.1907	35.5119	34.7814	35.6039	37.5815	37.3327
MnO	3.07903	3.2157	3.32106	3.26506	3.00025	3.24323	5.66322	6.09863	6.4663	7.21521	7.86348	7.02363	6.61047	6.58145	5.56955	5.43593
MgO	15.9997	14.1337	14.7117	15.2717	16.6281	15.9276	4.54373	4.33667	4.46826	4.46052	4.28732	4.53502	4.95689	4.89109	4.43334	4.18914
CaO	0.03605	0.0309	0	0	0	0.04223	0.1449	0.2142	0.3108	0.19005	0.15645	0.2163	0.21105	0.17955	0.2	0.247
H2O*	11.5479	11.5341	11.5653	11.6573	11.6671	11.7426	10.5757	10.4749	10.526	10.519	10.468	10.4594	10.5393	10.543	10.5517	10.4429
Total	99.6301	101.266	101.167	101.528	100.537	101.967	99.2062	98.8777	99.1283	99.5867	99.357	99.2853	99.1401	99.6257	100.295	99.3907
Si4+	2.70547	2.6485	2.64179	2.64744	2.68789	2.62432	2.87544	2.94397	2.91951	3.11588	3.14249	2.97051	3.13605	3.08098	2.96512	2.85236
IVAl3+	1.29453	1.3515	1.35821	1.35256	1.31211	1.37568	1.12456	1.05603	1.08049	0.884123	0.857505	1.02949	0.86395	0.919025	1.03488	1.14764
Sum T	4	4	4	4	4	4	4	4	4	4	4	4	4	4	4	4
Ti4+	0.00482805	0	0	0.00876837	0.00398227	0	0	0	0	0	0	0	0	0	0.00324897	0
VIAl3+	1.36829	1.3631	1.36304	1.36146	1.35058	1.36959	1.27898	1.1843	1.20959	1.05699	1.02813	1.08348	1.07864	1.05781	1.08042	1.14105
Cr3+	0	0.00609705	0.00363148	0.00318389	0.00368351	0	0	0	0	0	0	0	0	0	0.00404412	0
Fe2+	1.83299	2.14429	2.06294	1.98484	1.80716	1.923	3.31401	3.39359	3.30484	3.37835	3.37192	3.40552	3.31015	3.38726	3.57243	3.58578
Mn2+	0.270865	0.283226	0.291716	0.284535	0.261238	0.28058	0.543998	0.591457	0.624071	0.696811	0.763121	0.68218	0.637181	0.634164	0.536214	0.528807
Mg2+	2.47731	2.19099	2.27445	2.3424	2.54829	2.42525	0.768201	0.740245	0.759004	0.758193	0.732306	0.775256	0.840944	0.829495	0.751236	0.717258
Ca2+	0.00401177	0.00344276	0	0	0	0.00462159	0.0176073	0.0262786	0.0379446	0.023218	0.0192064	0.0265757	0.025734	0.0218855	0.0243579	0.0303956
Sum A	5.95829	5.99115	5.99577	5.98519	5.97494	6.00304	5.92279	5.93587	5.93545	5.91357	5.91469	5.97301	5.89265	5.93061	5.97195	6.00329
(OH)-	8	8	8	8	8	8	8	8	8	8	8	8	8	8	8	8
Sum an.	8	8	8	8	8	8	8	8	8	8	8	8	8	8	8	8
#Mg	0.574741	0.505387	0.524382	0.541315	0.58508	0.557754	0.188183	0.17907	0.18677	0.183291	0.178427	0.185434	0.202583	0.196714	0.17375	0.166686
Chemical formulae calculated on the basis of 14 cO atoms (apfu), symbol * represents calculation of H2O from (OH)-

## Sheet: Stilpnomelane
Analysis	1	2	3	4	5	6	7	8	9	10	11	12	13	14	15	16
Mineral	Stilpnomelane
SiO2	47.478	47.434	47.066	46.968	46.137	45.422	46.686	47.087	47.175	46.988	47.075	47.206	47.135	46.796	46.902	46.555
TiO2	0.019	0.019	0.03	0.043	0.008	0.016	0.03	0.025	0	0.019	0.005	0	0	0.014	0.033	0.005
Al2O3	5.084	5.137	5.033	4.994	4.942	4.806	4.785	5.07	5.188	5.19	5.092	5.062	5.133	5.055	5.096	5.114
Fe2O3	0	0	0	0	0	0	0	0	0	0	0	0	0	0	0	0
FeO	20.925	20.666	21.189	21.598	21.647	20.598	19.888	21.142	21.665	20.613	20.956	21.101	20.992	20.778	20.732	20.47
MnO	11.863	10.836	11.068	10.754	11.542	11.498	11.316	11.108	10.923	10.897	10.836	10.703	10.953	10.716	9.606	10.208
MgO	4.539	4.515	4.544	4.663	4.408	4.413	4.27	4.519	4.518	4.501	4.51	4.497	4.578	4.688	4.811	4.719
CaO	0.71	0.478	0.762	0.985	1.129	1.287	1.063	0.671	0.736	0.737	0.639	0.805	0.683	0.905	0.902	0.841
Ba	1.038	0.784	0.863	0.668	0.752	0.846	0.787	1.132	1.118	1.11	0.951	1.162	1.135	1.149	1.182	1.14
Na2O	0	0.006	0.017	0	0.003	0	0.018	0.041	0.024	0.01	0.046	0.013	0.003	0.035	0.001	0
K2O	0.294	0.459	0.315	0.51	0.299	0.218	0.354	0.136	0.177	0.254	0.376	0.139	0.149	0.12	0.115	0.184
Total	91.95	90.334	90.887	91.183	90.867	89.104	89.197	90.931	91.524	90.319	90.486	90.688	90.761	90.256	89.38	89.236
Si4+	10.8153	10.9428	10.8336	10.7962	10.6777	10.7328	10.994	10.8362	10.7959	10.8898	10.8836	10.9036	10.8554	10.8568	10.9611	10.9046
IVAl3+	1.1847	1.05715	1.16639	1.20377	1.322	1.2672	1.00603	1.16382	1.20413	1.11017	1.11643	1.09637	1.14462	1.14316	1.03889	1.09537
Sum	12	12	12	12	12	12	12	12	12	12	12	12	12	12	12	12
Ti4+	0.00325557	0.00329702	0.00519415	0.00743474	0.00139266	0.00284377	0.00531394	0.00432755	0	0.00331219	0.000869517	0	0	0.00244315	0.00580102	0.000880931
VIAl3+	0.180213	0.339549	0.198964	0.149146	0.026	0.0711908	0.321987	0.211284	0.195138	0.307438	0.271034	0.28163	0.248624	0.239031	0.364718	0.316388
Fe2+	3.98626	3.98704	4.07878	4.15181	4.18965	4.07029	3.91663	4.06888	4.14628	3.99512	4.05175	4.07597	4.04305	4.03137	4.05189	4.00974
Mn2+	2.28888	2.11735	2.15783	2.09374	2.26251	2.30119	2.25706	2.16518	2.11724	2.13907	2.12194	2.09393	2.13657	2.10577	1.90147	2.0252
Mg2+	1.54139	1.55276	1.55923	1.59787	1.52081	1.55449	1.499	1.55033	1.54134	1.55507	1.5544	1.54847	1.57175	1.62139	1.67612	1.64779
Sum	8	8	8	8	8	8	8	8	8	8	8	8	8	8	8	8
Ca2+	0.173283	0.118146	0.187919	0.242581	0.279944	0.325819	0.268196	0.165443	0.180457	0.183001	0.158282	0.199214	0.168528	0.224954	0.22585	0.211053
Ba2+	0.092657	0.0708747	0.0778415	0.0601701	0.0681992	0.0783342	0.0726235	0.102084	0.100259	0.100807	0.0861581	0.105175	0.102431	0.10446	0.108247	0.104637
Na+	0	0.00268371	0.00758681	0	0.00134615	0	0.00821835	0.0182938	0.0106488	0.00449344	0.0206197	0.00582186	0.00133958	0.0157437	0.000453114	0
K+	0.0854387	0.135087	0.0924991	0.149555	0.0882793	0.0657149	0.106349	0.0399278	0.051675	0.0750981	0.1109	0.040959	0.0437773	0.035517	0.0342864	0.0549824
Sum	0.351378	0.326792	0.365847	0.452306	0.437769	0.469868	0.455386	0.325748	0.34304	0.363399	0.37596	0.351171	0.316076	0.380675	0.368837	0.370672
□	0.648622	0.673208	0.634153	0.547694	0.562231	0.530132	0.544614	0.674252	0.65696	0.636601	0.62404	0.648829	0.683924	0.619325	0.631163	0.629328
Chemical formulae calculated on the basis of 20 tetraehedral and octahedral cations (apfu), except of Ca, Na, K and Ba

## Sheet: Titanite
Analysis	1	2	3	4	5	6	7	8	9	10	11	12	13	14	15
SiO2	30.75	30.756	30.705	30.896	30.76	30.526	30.778	30.574	30.868	30.965	30.872	30.856	30.862	30.923	30.492
TiO2	37.713	37.709	37.155	37.511	37.678	37.449	36.453	37.142	37.404	39.159	37.18	37.906	38.865	36.969	39.37
Al2O3	1.859	1.29	1.434	2.061	2.086	1.633	2.557	1.819	2.208	1.687	1.02	1.446	1.172	1.747	0.765
Fe2O3	0.538883	0.612216	0.488884	0.452218	0.456662	0.671104	0.711104	0.511106	0.527772	0.461106	0.554439	0.548883	0.588883	0.548883	0.851103
Lu2O3	0	0	0	0	0.051	0.044	0	0.036	0	0	0.067	0	0	0.039	0
Yb2O3	0	0	0.029	0	0	0	0	0	0.067	0.039	0.05	0	0	0.073	0
Nd2O3	0	0.029	0.03	0.028	0	0	0	0	0	0	0	0	0.041	0	0.134
Ce2O3	0.041	0	0.057	0	0	0.036	0.028	0.085	0	0	0	0.046	0.039	0.082	0.058
Nb2O5	0.035	0.047	0.144	0.039	0.082	0.195	0.18	0	0	0.097	0.152	0.132	0.198	0.113	0.248
MnO	0.262	0.23	0.233	0.27	0.14	0.348	0.323	0.293	0.171	0.179	0.195	0.103	0.272	0.137	0.382
MgO	0	0	0	0	0	0	0.032	0	0	0	0	0	0	0.03	0
CaO	28.208	28.395	28.438	28.724	28.502	28.017	28.276	28.555	28.717	28.696	28.529	28.386	28.259	28.513	28.202
SrO	0.06	0.077	0.11	0.111	0.078	0.103	0.072	0.092	0.128	0.099	0.072	0.076	0.114	0.1	0.101
F	0.887	0.665	0.707	0.916	0.978	0.675	1.248	0.818	0.985	0.73	0.438	0.652	0.56	0.861	0.373
O=F	-0.37349	-0.280012	-0.297697	-0.385701	-0.411807	-0.284223	-0.525496	-0.344436	-0.414755	-0.307382	-0.184429	-0.274538	-0.2358	-0.362542	-0.157059
Total	99.9804	99.5302	99.2332	100.623	100.4	99.4129	100.133	99.5807	100.661	101.805	98.945	99.8773	100.735	99.7733	100.819
Si4+	1.00029	1.00516	1.00622	0.9969	0.995938	0.999642	0.998251	0.997222	0.995644	0.990723	1.01403	1.00501	0.999721	1.00742	0.989714
Ti4+	0.922781	0.926991	0.915858	0.910406	0.917616	0.922448	0.889324	0.911239	0.907488	0.942411	0.91859	0.928683	0.94698	0.905932	0.961206
Al3+	0.0712711	0.0496874	0.0553842	0.0783756	0.0796001	0.0630252	0.0977425	0.0699239	0.083936	0.0636136	0.0394856	0.0555078	0.0447441	0.0670775	0.0292643
Fe3+	0.0131915	0.0150566	0.0120562	0.0109803	0.0111265	0.016538	0.0173561	0.012545	0.0128104	0.011102	0.0137043	0.0134534	0.014355	0.0134564	0.0207886
Lu3+	0	0	0	0	0.000498652	0.00043512	0	0.000354588	0	0	0.000664571	0	0	0.000383687	0
Yb3+	0	0	0.000289787	0	0	0	0	0	0.000658972	0.000380489	0.000500785	0	0	0.000725187	0
Nd3+	0	0.000338477	0.000351102	0.000322653	0	0	0	0	0	0	0	0	0.000474315	0	0.00155331
Ce3+	0.000488288	0	0.000683865	0	0	0.000431607	0.000332483	0.00101501	0	0	0	0.000548532	0.000462521	0.00097804	0.000689229
Nb5+	0.000514718	0.00069442	0.00213338	0.000568899	0.00120028	0.00288689	0.00263933	0	0	0.00140305	0.00225709	0.00194369	0.00289962	0.00166429	0.00363912
Mn2+	0.00721879	0.0063667	0.00646729	0.00737898	0.00383934	0.00965243	0.00887329	0.0080945	0.0046717	0.00485084	0.00542504	0.00284153	0.00746288	0.00378037	0.010502
Mg2+	0	0	0	0	0	0	0.00154723	0	0	0	0	0	0	0.001457	0
Ca2+	0.983113	0.994251	0.998466	0.99299	0.988717	0.982985	0.98258	0.997867	0.992397	0.983679	1.00397	0.990574	0.980759	0.995232	0.980742
Sr2+	0.00113175	0.0014592	0.00209024	0.00207679	0.0014644	0.00195583	0.0013541	0.00173999	0.002394	0.00183669	0.00137131	0.00143537	0.00214131	0.00188908	0.00190092
Sum cat.	3	3	3	3	3	3	3	3	3	3	3	3	3	3	3
F-	0.0912547	0.0687347	0.0732747	0.0934751	0.100146	0.0699084	0.128016	0.0843808	0.100481	0.0738678	0.0454999	0.0671631	0.0573712	0.0887125	0.0382899
Sum an.	0.0912547	0.0687347	0.0732747	0.0934751	0.100146	0.0699084	0.128016	0.0843808	0.100481	0.0738678	0.0454999	0.0671631	0.0573712	0.0887125	0.0382899
Chemical formulae calculated on the basis of 3 cations (apfu)

[truncated: 9 more sheets: Pyrophanite, Magnetite, Fluorapatite, Alabandite, Sphalerite, Galena, Chalcopyrite, pyrrhotite, Pyrite]
